# Supplementary material for: Effect of substitution on halide/hydrated halide binding: a case study of neutral bis-urea receptors
Source: Royal Society of Chemistry journal article supplement (doi:10.1039/c9ce01918a), 2020-01-01
Supplement: c9ce01918a1.pdf [file c9ce01918a1.pdf]

**Electronic Supplementary Information**

**Effect of Substitution on Halide/Hydrated Halide  
Binding: A Case Study of Neutral Bis Urea  
Receptors**

*Asesh Das, Biswajit Nayak and Gopal Das\**

*Department of Chemistry, Indian Institute of Technology Guwahati,*

*Assam-781039, India*

*E-mail: gdas@iitg.ac.in*

## Table of Contents

|                                                                                                                                                                                                                                                                                                                                      |            |
|--------------------------------------------------------------------------------------------------------------------------------------------------------------------------------------------------------------------------------------------------------------------------------------------------------------------------------------|------------|
| <sup>1</sup> H-NMR spectrum (full as well as expanded) of Chloride complex of <b>L</b> <sub>1</sub>                                                                                                                                                                                                                                  | Figure S1  |
| FT-IR spectrum of Chloride complex of receptor <b>L</b> <sub>1</sub>                                                                                                                                                                                                                                                                 | Figure S2  |
| <sup>1</sup> H-NMR spectrum (full as well as expanded) of Bromide complex of <b>L</b> <sub>1</sub>                                                                                                                                                                                                                                   | Figure S3  |
| FT-IR spectrum of Bromide complex of receptor <b>L</b> <sub>1</sub>                                                                                                                                                                                                                                                                  | Figure S4  |
| <sup>1</sup> H-NMR spectrum (full as well as expanded) of free receptor <b>L</b> <sub>2</sub>                                                                                                                                                                                                                                        | Figure S5  |
| FT-IR spectrum of receptor <b>L</b> <sub>2</sub>                                                                                                                                                                                                                                                                                     | Figure S6  |
| ESI-Mass spectrum of dipodal receptor <b>L</b> <sub>2</sub>                                                                                                                                                                                                                                                                          | Figure S7  |
| <sup>1</sup> H-NMR spectrum (full as well as expanded) of Chloride complex of <b>L</b> <sub>2</sub>                                                                                                                                                                                                                                  | Figure S8  |
| FT-IR spectrum of Chloride complex of receptor <b>L</b> <sub>2</sub>                                                                                                                                                                                                                                                                 | Figure S9  |
| <sup>1</sup> H-NMR spectrum (full as well as expanded) of Bromide complex of <b>L</b> <sub>2</sub>                                                                                                                                                                                                                                   | Figure S10 |
| FT-IR spectrum of Bromide complex of receptor <b>L</b> <sub>2</sub>                                                                                                                                                                                                                                                                  | Figure S11 |
| <sup>1</sup> H-NMR spectrum (full as well as expanded) of free receptor <b>L</b> <sub>3</sub>                                                                                                                                                                                                                                        | Figure S12 |
| ESI-Mass spectrum of dipodal receptor <b>L</b> <sub>3</sub> .                                                                                                                                                                                                                                                                        | Figure S13 |
| FT-IR spectrum of receptor <b>L</b> <sub>3</sub> recorded                                                                                                                                                                                                                                                                            | Figure S14 |
| <sup>1</sup> H-NMR spectrum (full as well as expanded) of Chloride complex of <b>L</b> <sub>3</sub>                                                                                                                                                                                                                                  | Figure S15 |
| FT-IR spectrum of Chloride complex of receptor <b>L</b> <sub>3</sub>                                                                                                                                                                                                                                                                 | Figure S16 |
| <sup>1</sup> H-NMR spectrum (full as well as expanded) of Bromide complex of <b>L</b> <sub>3</sub>                                                                                                                                                                                                                                   | Figure S17 |
| FT-IR spectrum of Bromide complex of receptor <b>L</b> <sub>3</sub>                                                                                                                                                                                                                                                                  | Figure S18 |
| <sup>1</sup> H-NMR spectrum (full as well as expanded) of free receptor <b>L</b> <sub>4</sub>                                                                                                                                                                                                                                        | Figure S19 |
| ESI-Mass spectrum of dipodal receptor <b>L</b> <sub>4</sub> .                                                                                                                                                                                                                                                                        | Figure S20 |
| FT-IR spectrum of receptor <b>L</b> <sub>4</sub> recorded                                                                                                                                                                                                                                                                            | Figure S21 |
| <sup>1</sup> H-NMR spectrum (full as well as expanded) of Chloride complex of <b>L</b> <sub>4</sub>                                                                                                                                                                                                                                  | Figure S22 |
| FT-IR spectrum of chloride complex of receptor <b>L</b> <sub>4</sub>                                                                                                                                                                                                                                                                 | Figure S23 |
| <sup>1</sup> H-NMR spectrum (full as well as expanded) Bromide complex of receptor <b>L</b> <sub>4</sub>                                                                                                                                                                                                                             | Figure S24 |
| FT-IR spectrum of Bromide complex of dipodal receptor <b>L</b> <sub>4</sub>                                                                                                                                                                                                                                                          | Figure S25 |
| X-ray structure analysis of complex <b>1a</b> showing coordination environment of anion as well as extra stabilization through C-H <sub>aliphatic</sub> ...O <sub>urea</sub> and C-H <sub>aliphatic</sub> ... π <sub>aromatic</sub> interaction with proper bond distances in Angstrom.                                              | Figure S26 |
| X-ray structure analysis of complex <b>1b</b> showing coordination environment of anion as well as extra stabilization through C-H <sub>aliphatic</sub> ...O <sub>urea</sub> , C-H <sub>aliphatic</sub> ... π <sub>aromatic</sub> C-H <sub>aliphatic</sub> ...O <sub>water</sub> interaction with proper bond distances in Angstrom. | Figure S27 |
| X-ray structure analysis of complex <b>2a</b> showing coordination environment of anion as well as extra stabilization through two C-H <sub>aliphatic</sub> ...O <sub>urea</sub> with proper bond distances in Angstrom.                                                                                                             | Figure S28 |
| X-ray structure analysis of complex <b>2b</b> showing coordination environment of anion as well as extra stabilization through C-H <sub>aliphatic</sub> ...O <sub>urea</sub> , with proper bond distances in Angstrom.                                                                                                               | Figure S29 |
| X-ray structure analysis of complex <b>3a</b> showing coordination environment of anion as well as extra stabilization through three C-H <sub>aliphatic</sub> ...O <sub>urea</sub> , four C-H <sub>aliphatic</sub> ...O interaction.                                                                                                 | Figure S30 |
| X-ray structure analysis of complex <b>3b</b> showing coordination environment of anion as well as extra stabilization through three C-H <sub>aliphatic</sub> ...O <sub>urea</sub> , two C-H                                                                                                                                         | Figure S31 |

|                                                                                                                                                                                                                                   |            |
|-----------------------------------------------------------------------------------------------------------------------------------------------------------------------------------------------------------------------------------|------------|
| aliphatic...O interaction involving one oxygen atom of substituted NO <sub>2</sub> group with proper bond distances in Angstrom.                                                                                                  |            |
| X-ray structure analysis of complex <b>4a</b> showing coordination environment of anion as well as extra stabilization through two C-H <sub>aliphatic</sub> ...O <sub>urea</sub> interaction with proper distances in Angstrom.   | Figure S32 |
| X-ray structure analysis of complex <b>4b</b> showing coordination environment of anion as well as extra stabilization through three C-H <sub>aliphatic</sub> ...O <sub>urea</sub> interaction with proper distances in Angstrom. | Figure S33 |
| The scatter plot of N-H...A angle vs. H...A distance of the hydrogen bonds in the complexes ( <b>1a</b> , <b>1b</b> , <b>2a</b> , <b>2b</b> , <b>3a</b> , <b>3b</b> , <b>4a</b> and <b>4b</b> ).                                  | Figure S34 |
| <sup>1</sup> H NMR titration plot and bind-fit curve of Chloride complex of <b>L<sub>1</sub></b>                                                                                                                                  | Figure S35 |
| <sup>1</sup> H NMR titration plot and bind-fit curve of Bromide complex of <b>L<sub>1</sub></b>                                                                                                                                   | Figure S36 |
| <sup>1</sup> H NMR titration plot and bind-fit curve of Chloride complex of <b>L<sub>2</sub></b>                                                                                                                                  | Figure S37 |
| <sup>1</sup> H NMR titration plot and bind-fit curve of Bromide complex of <b>L<sub>2</sub></b>                                                                                                                                   | Figure S38 |
| Hydrogen bonding distances (Å) and Bond angles (°) in the neutral anion-receptor complexes.                                                                                                                                       | Table S1   |
| Contact contributions from the d <sub>norm.</sub> surface areas of dipodal segments in free receptors and in anion complexes.                                                                                                     | Table S2   |

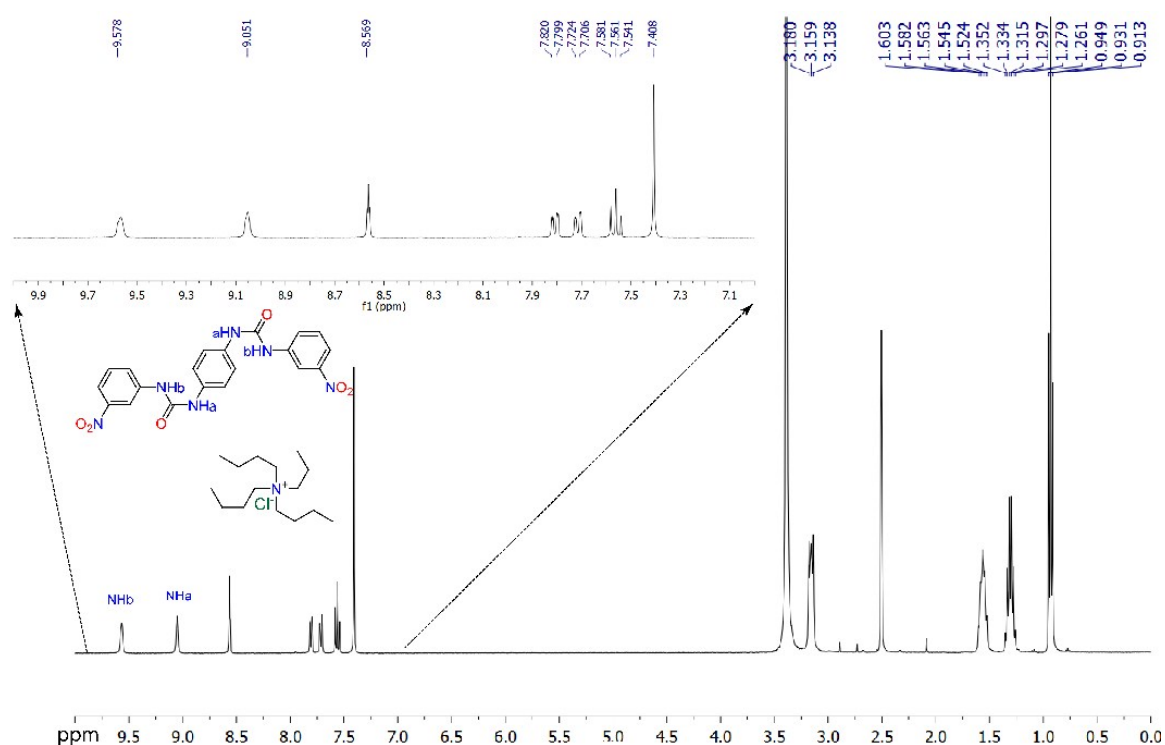

**Figure S1:** Integrated <sup>1</sup>H-NMR spectrum (full as well as expanded) of Chloride complex of **L<sub>1</sub>** in DMSO-d<sub>6</sub> at 25°C.

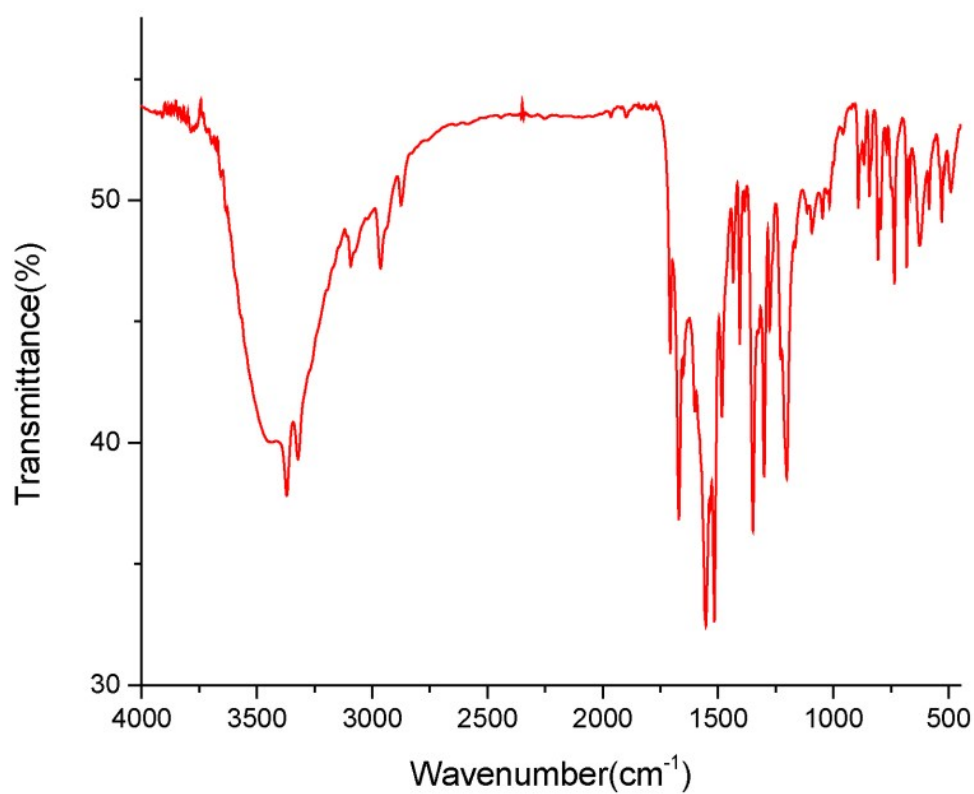

**Figure S2:** FT-IR spectrum of Chloride complex of receptor **L**<sub>1</sub> recorded in KBr pellet.

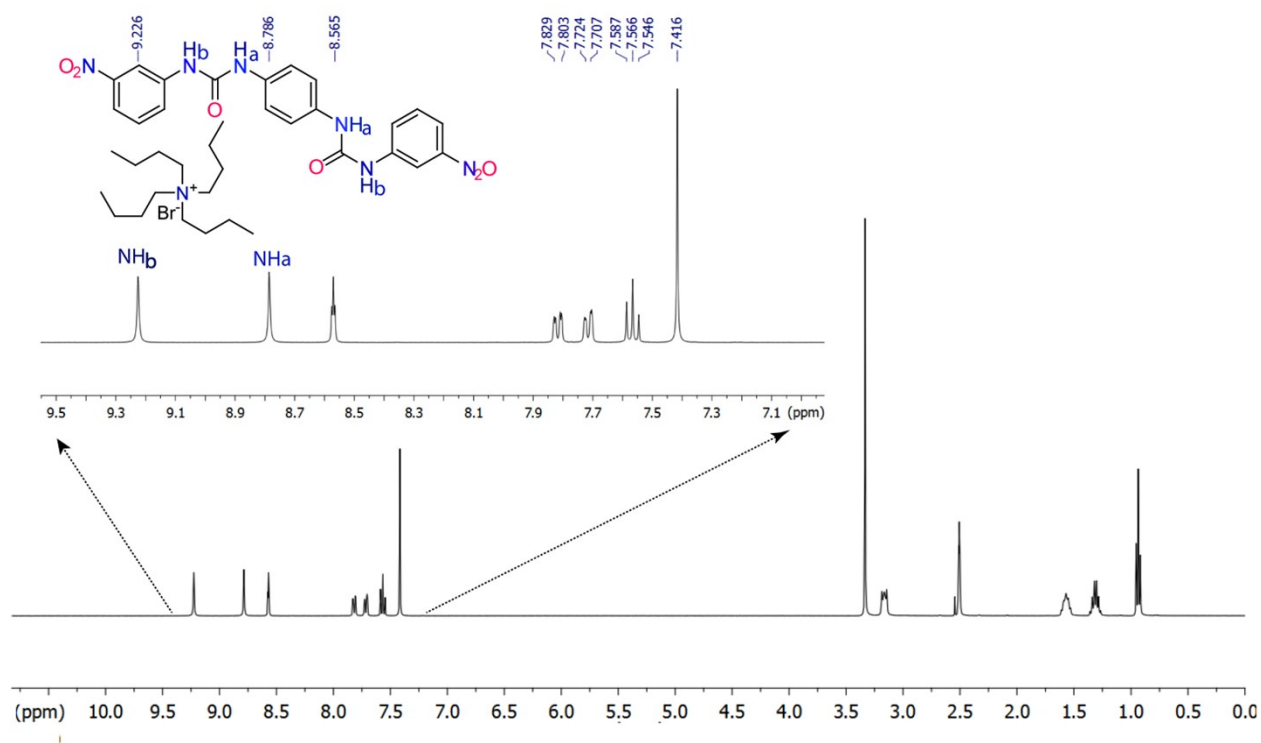

**Figure S3:** Integrated <sup>1</sup>H-NMR spectrum (full as well as expanded) of Bromide complex of **L**<sub>1</sub> in DMSO-d<sub>6</sub> at 25°C.

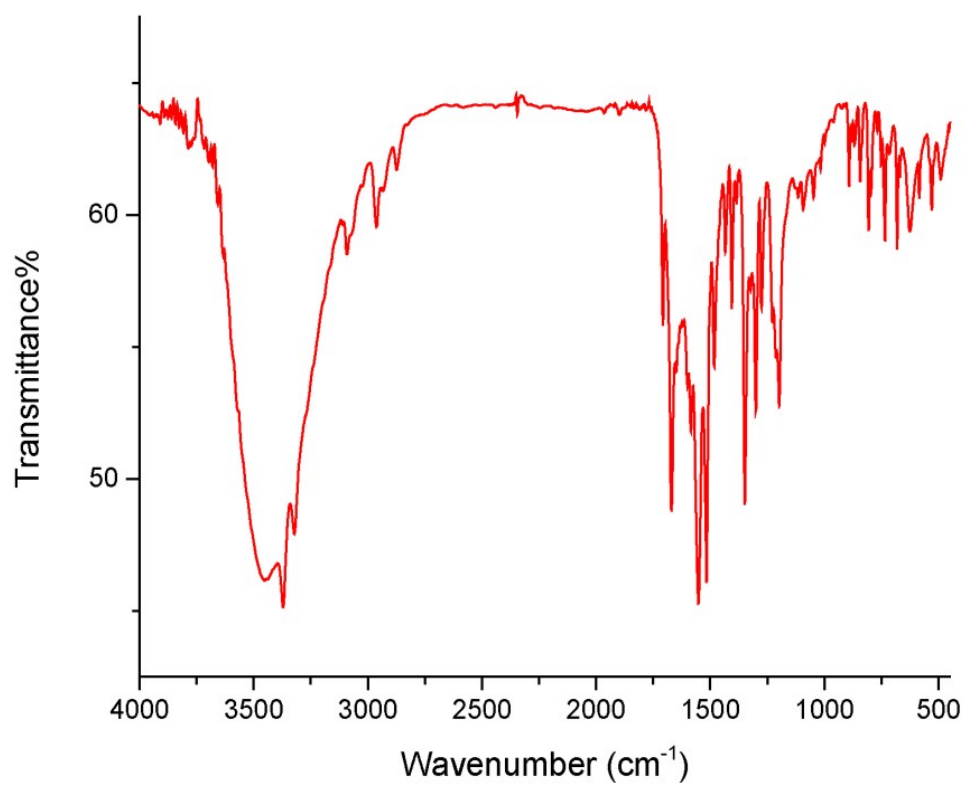

**Figure S4:** FT-IR spectrum of Bromide complex of receptor **L<sub>1</sub>** recorded in KBr pellet.

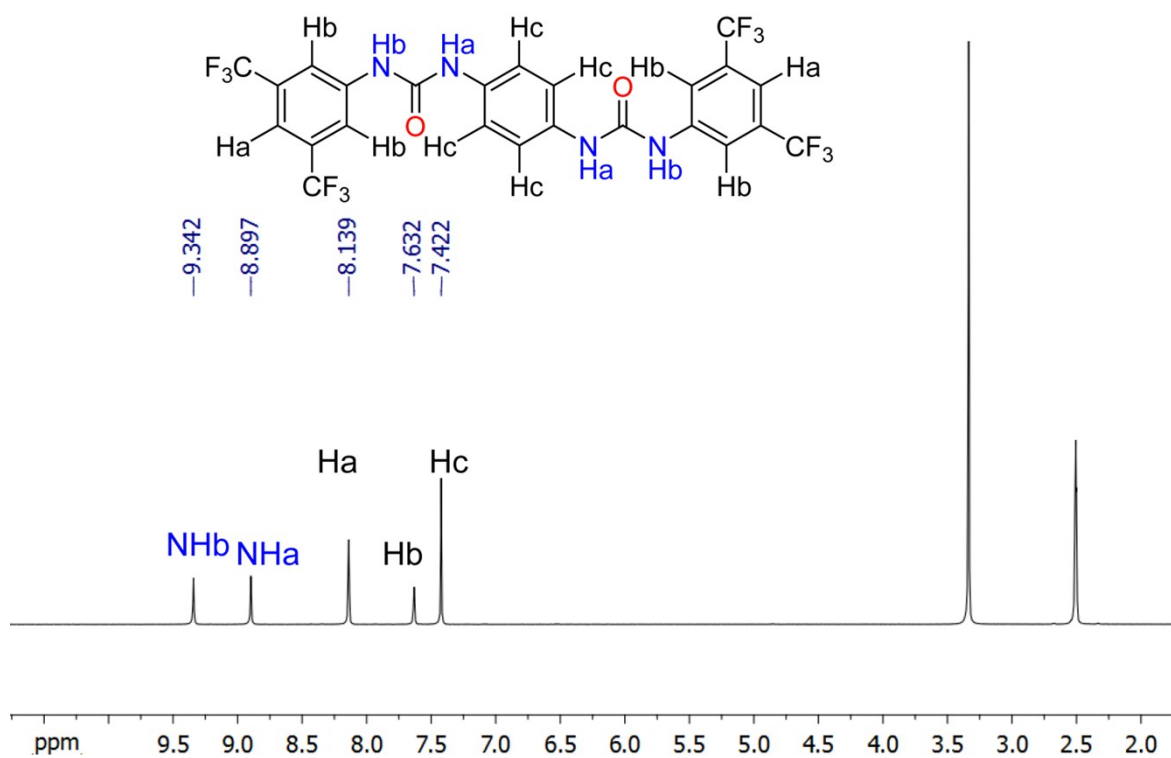

**Figure S5:** Integrated  $^1\text{H}$ -NMR spectrum (full as well as expanded) and explanation of all hydrogen atoms of free dipodal receptor  $\text{L}_2$  in  $\text{DMSO-d}_6$  at  $25^\circ\text{C}$ .

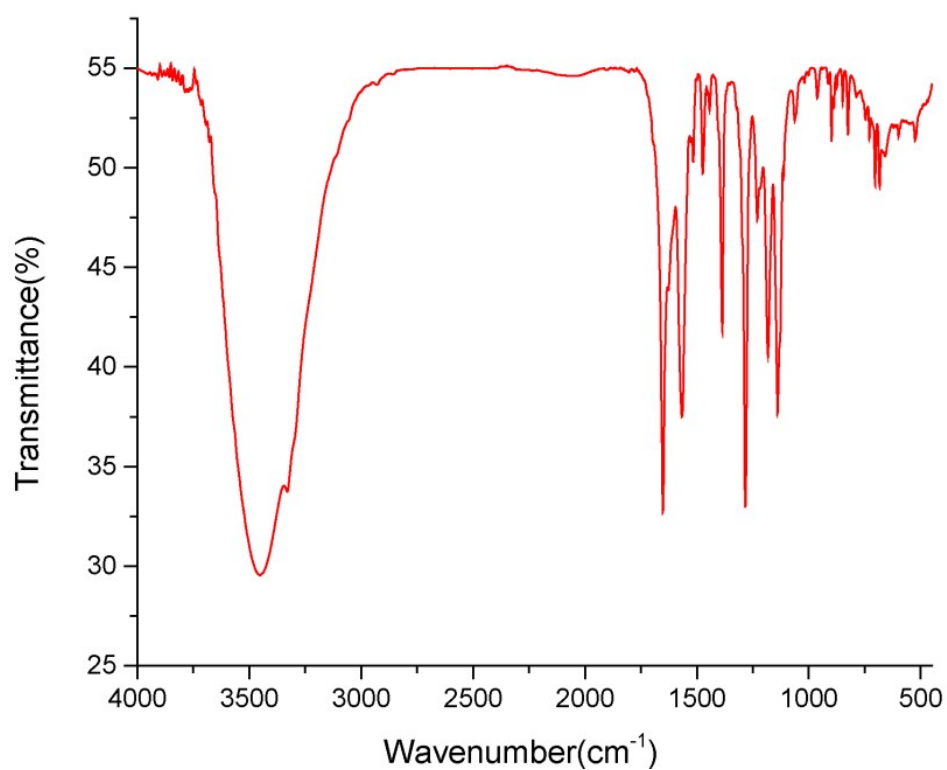

**Figure S6:** FT-IR spectrum of receptor  $\text{L}_2$  recorded in KBr pellet.

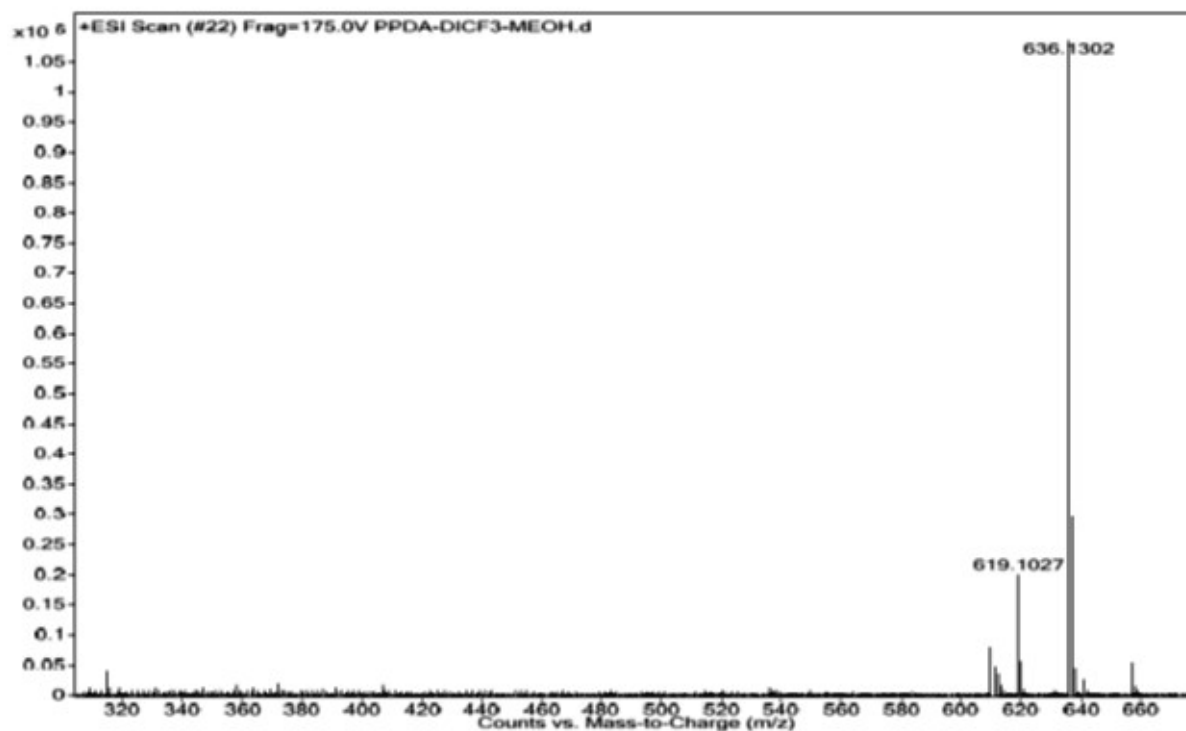

**Figure S7:** ESI-Mass spectrum of dipodal receptor **L**<sub>2</sub>.

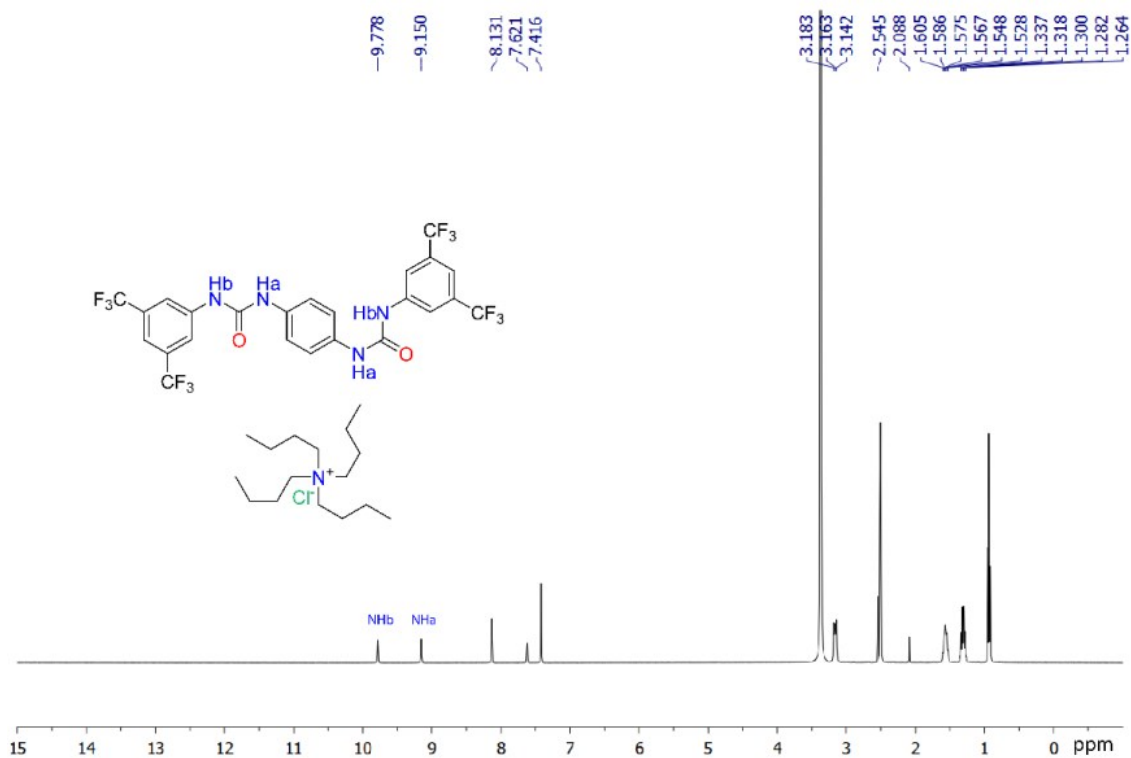

**Figure S8:** Integrated <sup>1</sup>H-NMR spectrum (full as well as expanded) of Chloride complex of receptor **L**<sub>2</sub> in DMSO-d<sub>6</sub> at 25°C.

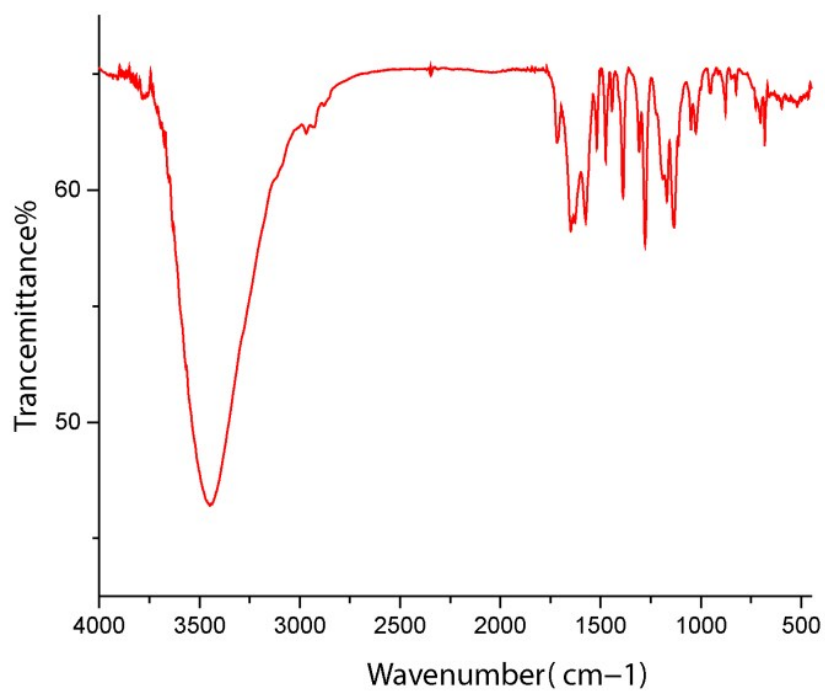

**Figure S9:** FT-IR spectrum of Chloride complex of receptor **L**<sub>2</sub> recorded in KBr pellet.

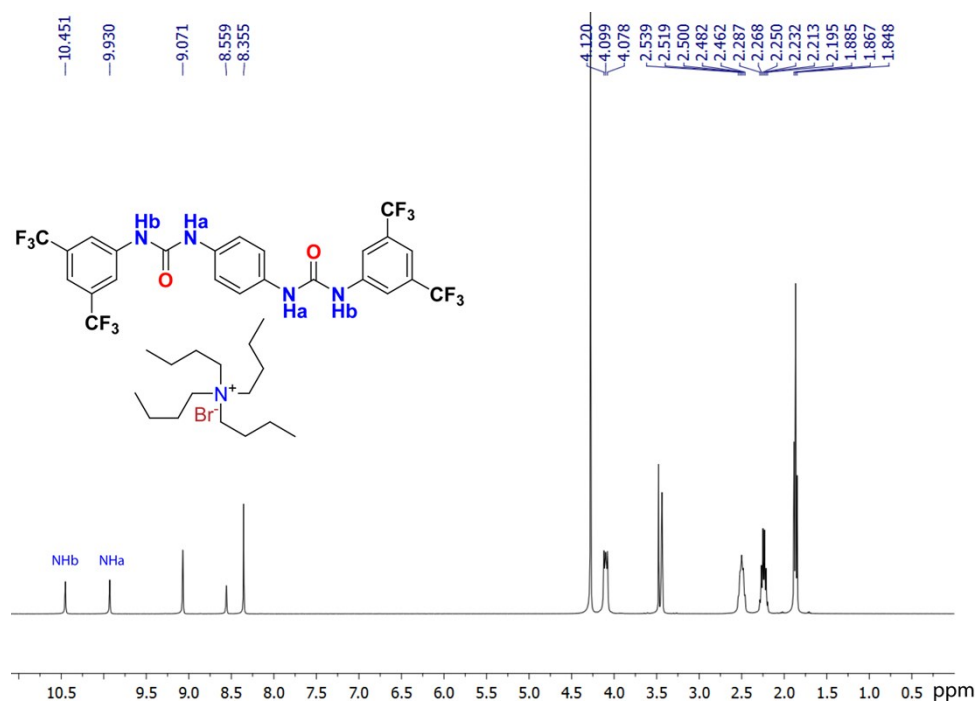

**Figure S10:** Integrated  $^1H$ -NMR spectrum (full as well as expanded) of Bromide complex of receptor  $L_2$  in  $DMSO-d_6$  at  $25^\circ C$ .

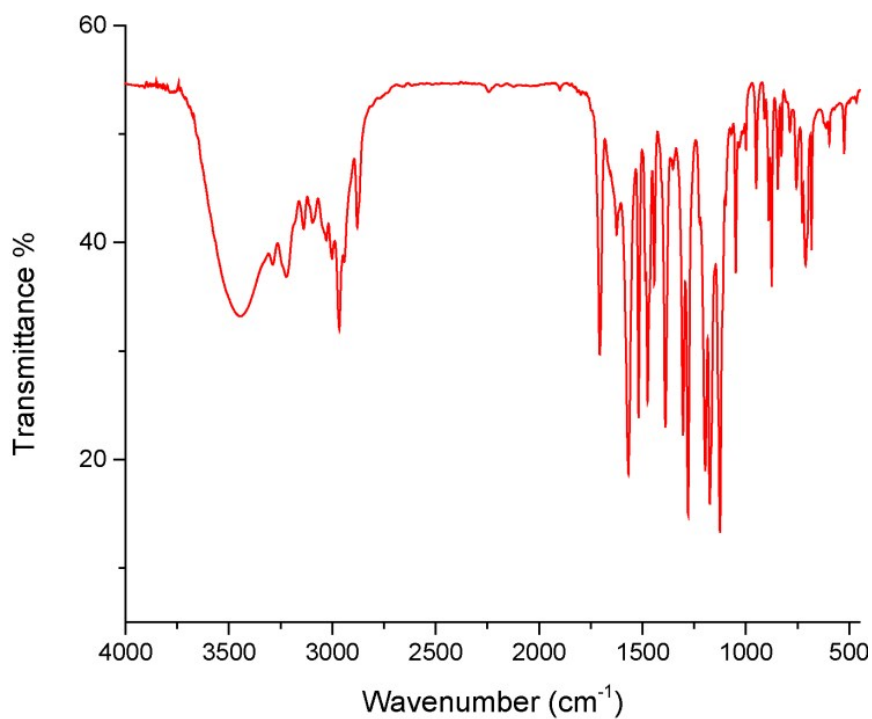

**Figure S11:** FT-IR spectrum of Bromide complex of receptor  $L_2$  recorded in KBr pellet.

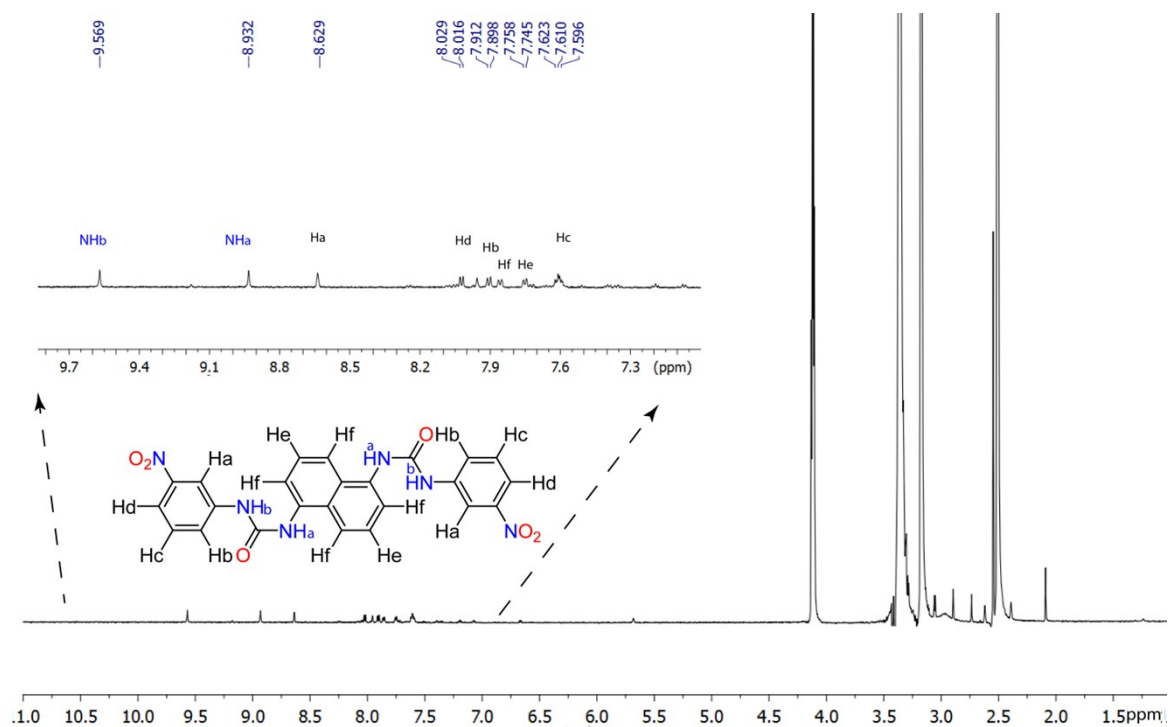

**Figure S12:** Integrated  $^1\text{H}$ -NMR spectrum (full as well as expanded) and explanation of all hydrogen atoms of free dipodal bis-urea receptor  $\text{L}_3$  in  $\text{DMSO-d}_6$  at  $25^\circ\text{C}$ .

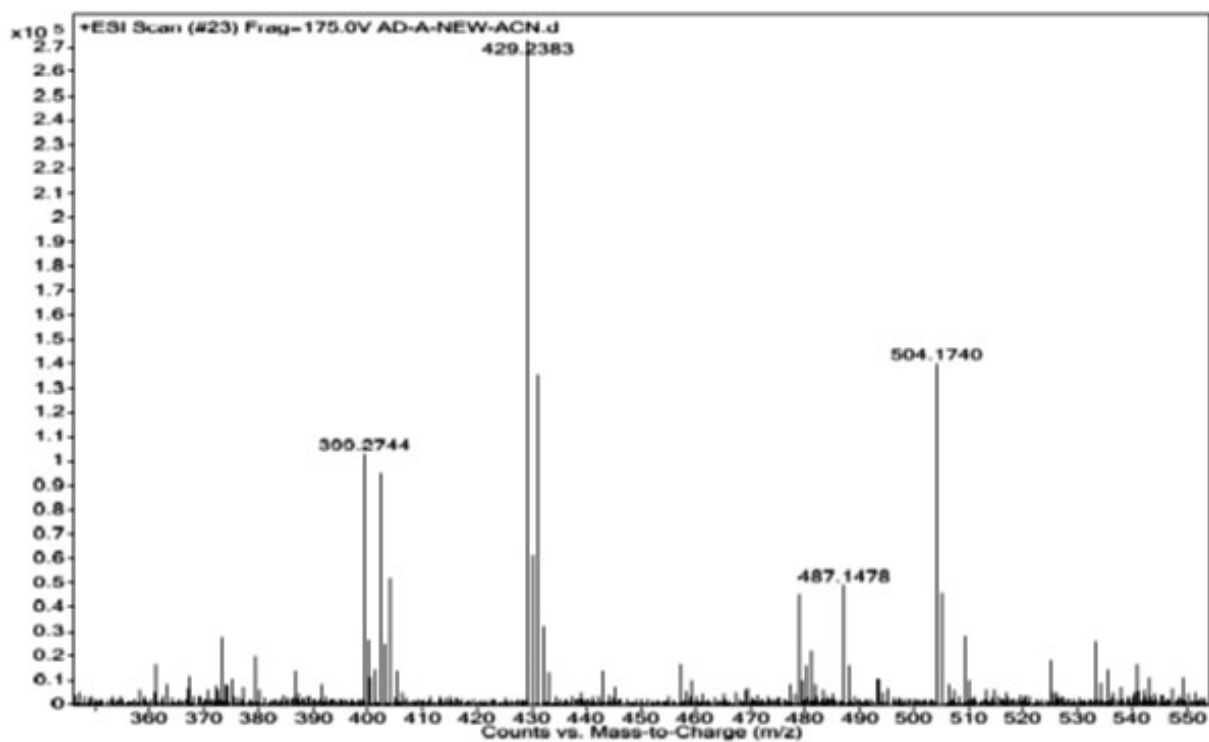

**Figure S13:** ESI-Mass spectrum of dipodal receptor  $\text{L}_3$ .

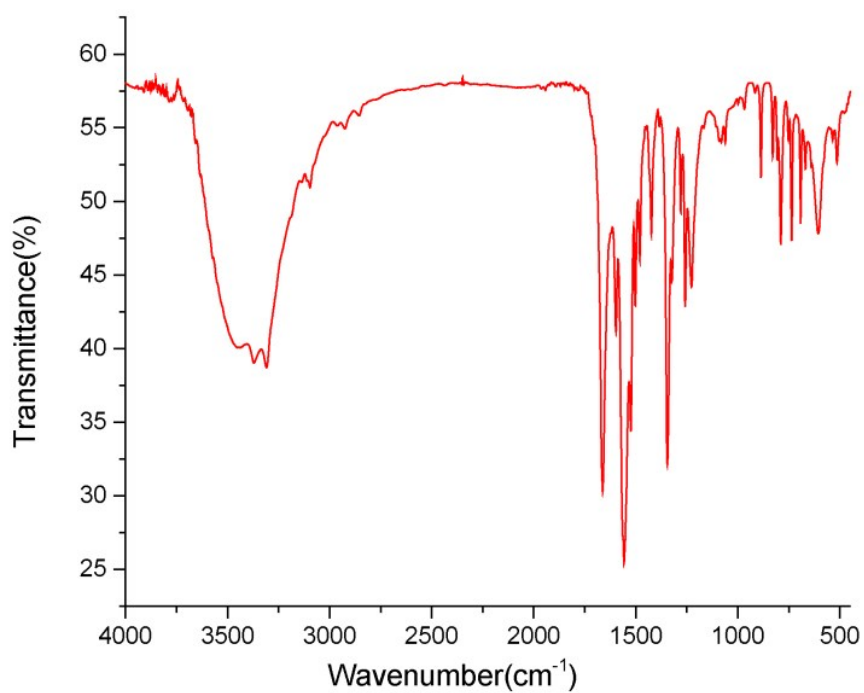

**Figure S14:** FT-IR spectrum of receptor **L**<sub>3</sub> recorded in KBr pellet.

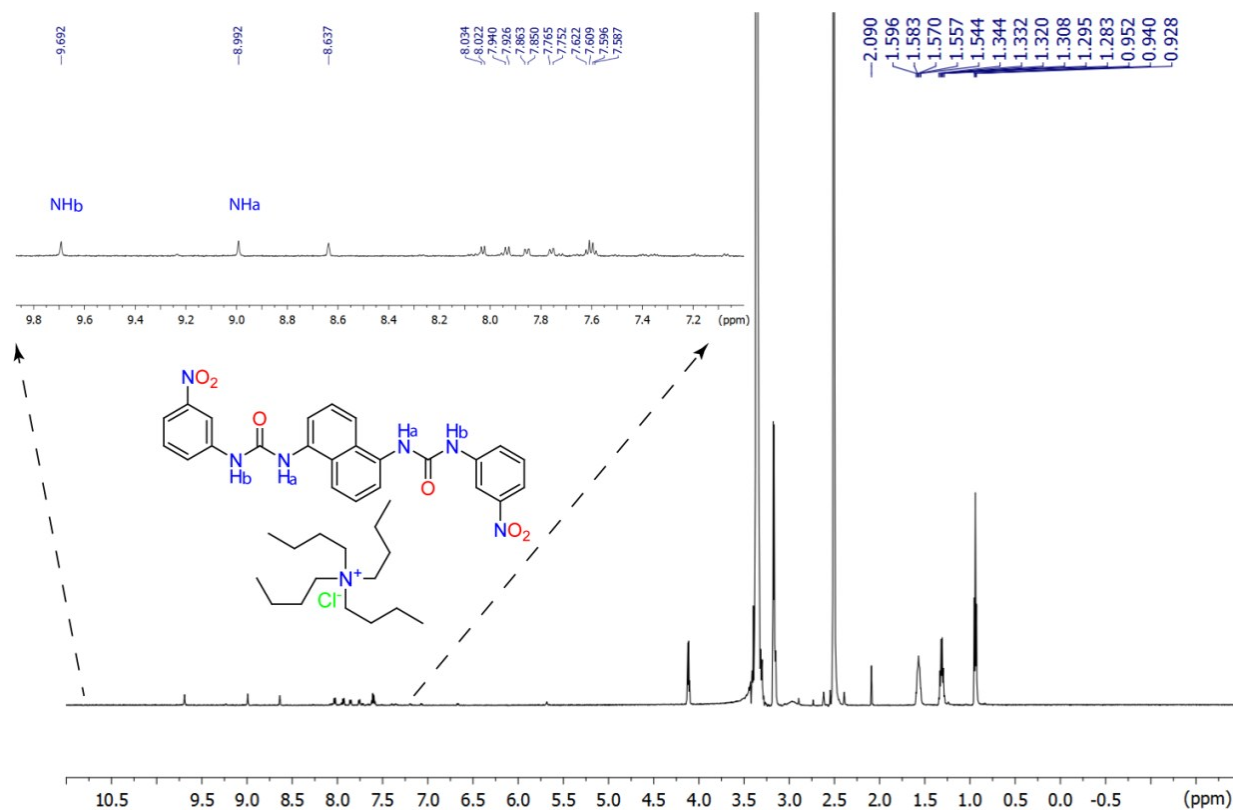

**Figure S15:** Integrated <sup>1</sup>H-NMR spectrum (full as well as expanded) of Chloride complex of receptor **L**<sub>3</sub> in DMSO-*d*<sub>6</sub> at 25°C.

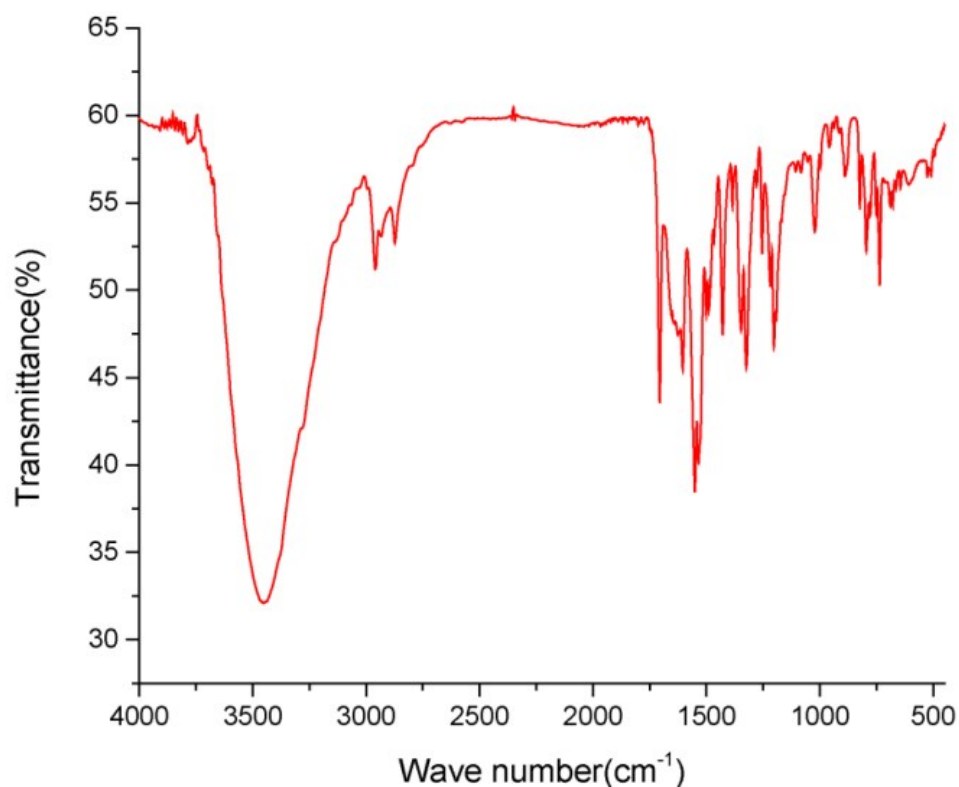

**Figure S16:** FT-IR spectrum of Chloride complex of receptor **L**<sub>3</sub> recorded in KBr pellet.

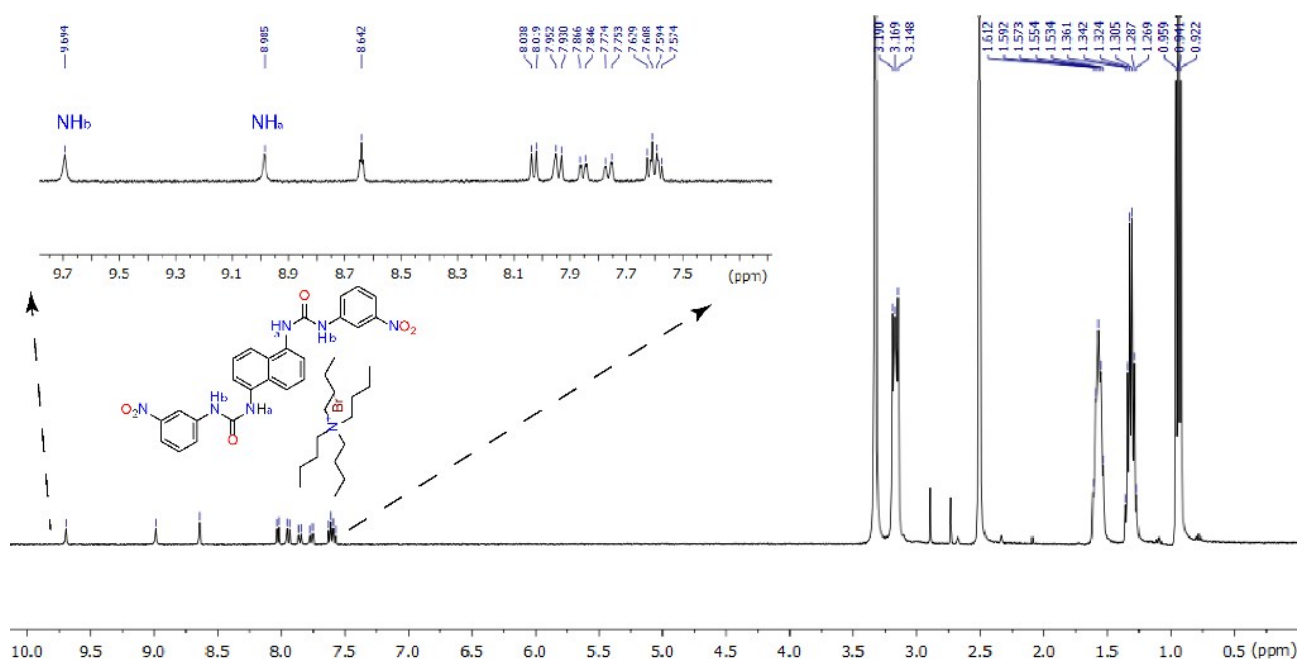

**Figure S17:** Integrated <sup>1</sup>H-NMR spectrum (full as well as expanded) of Bromide complex of receptor **L**<sub>3</sub> in DMSO-*d*<sub>6</sub> at 25°C.

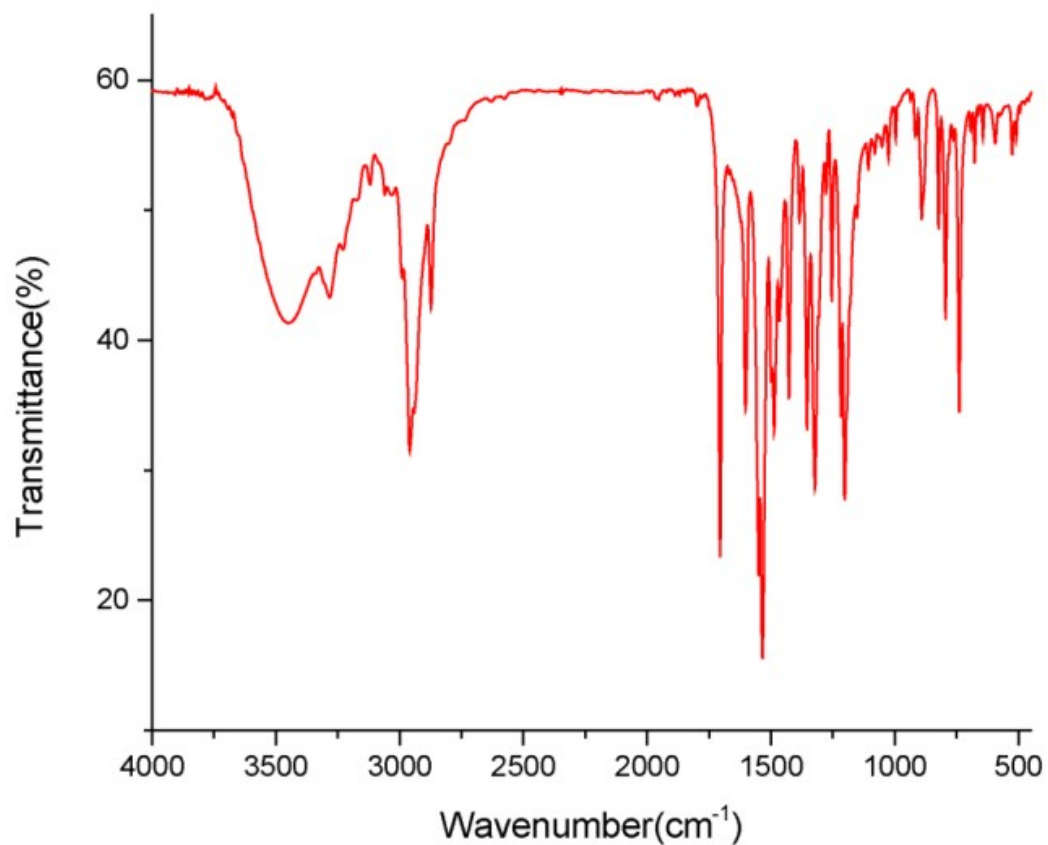

**Figure S18:** FT-IR spectrum of Bromide complex of receptor **L**<sub>3</sub> recorded in KBr pellet.

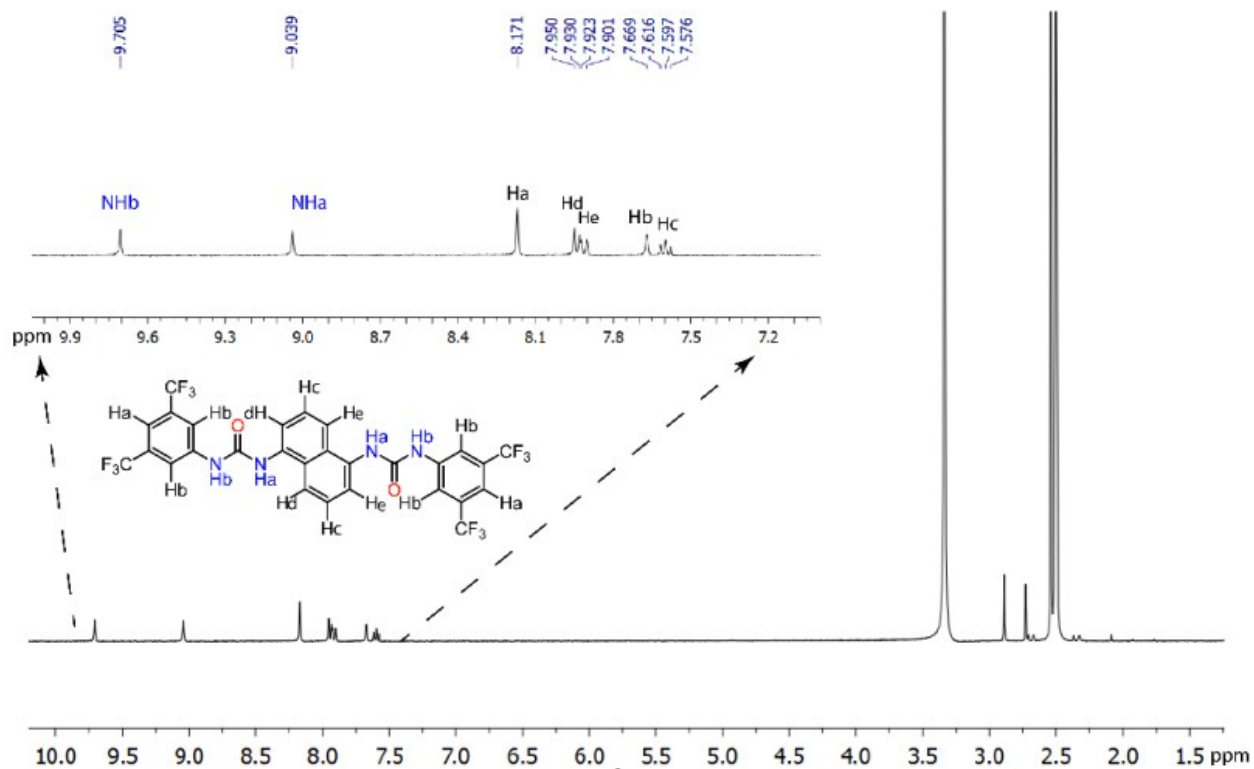

**Figure S19:** Integrated <sup>1</sup>H-NMR spectrum (full as well as expanded) and explanation of all hydrogen atoms of free dipodal bis urea receptor **L**<sub>4</sub> in DMSO-*d*<sub>6</sub> at 25°C.

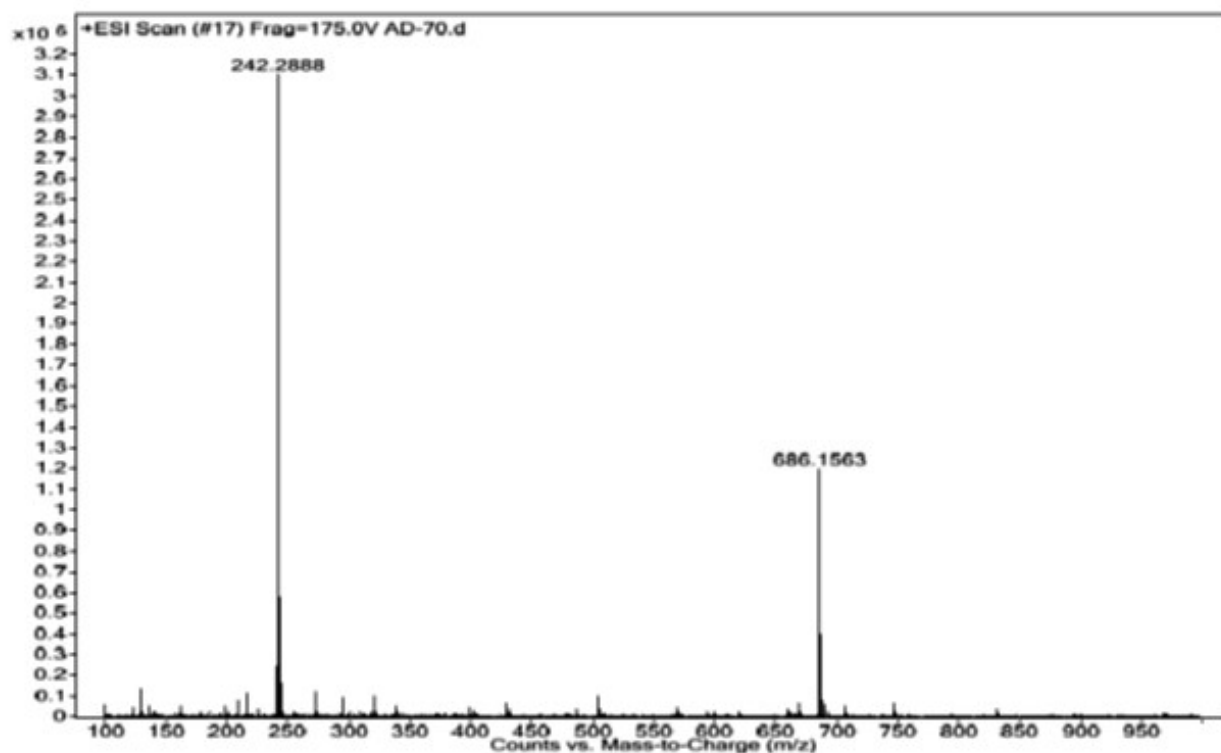

**Figure S20:** ESI-Mass spectrum of dipodal receptor **L<sub>4</sub>**.

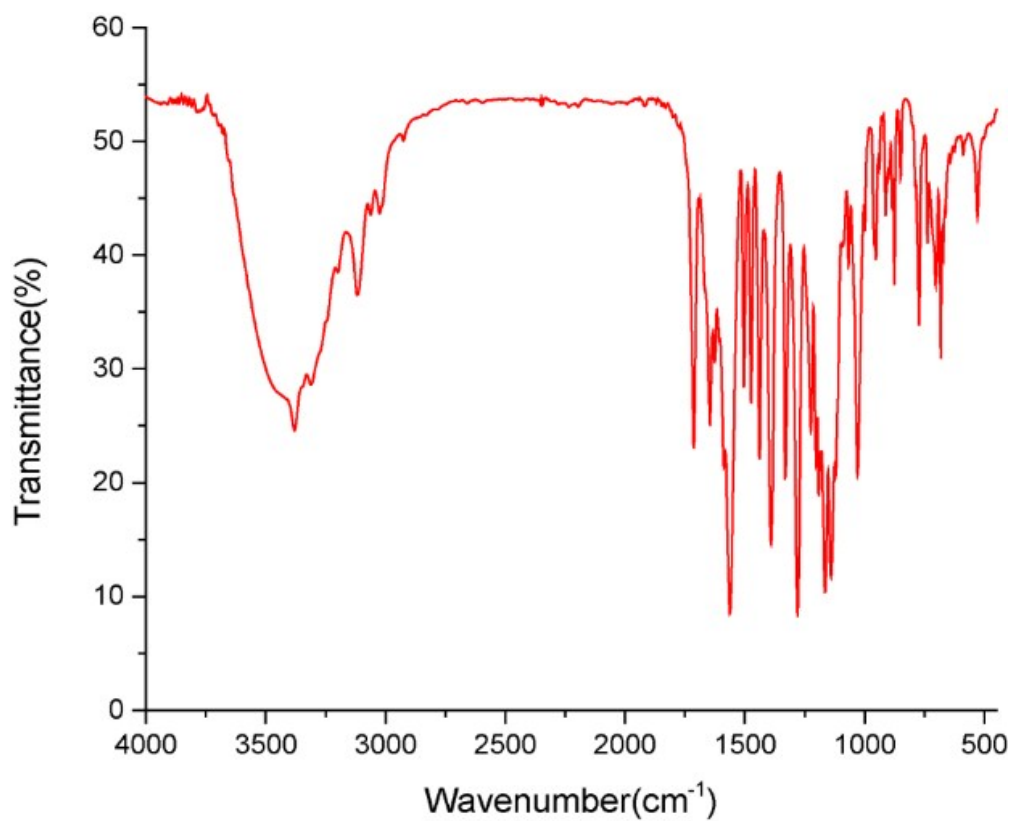

**Figure S21:** FT-IR spectrum of receptor **L<sub>4</sub>** recorded in KBr pellet.

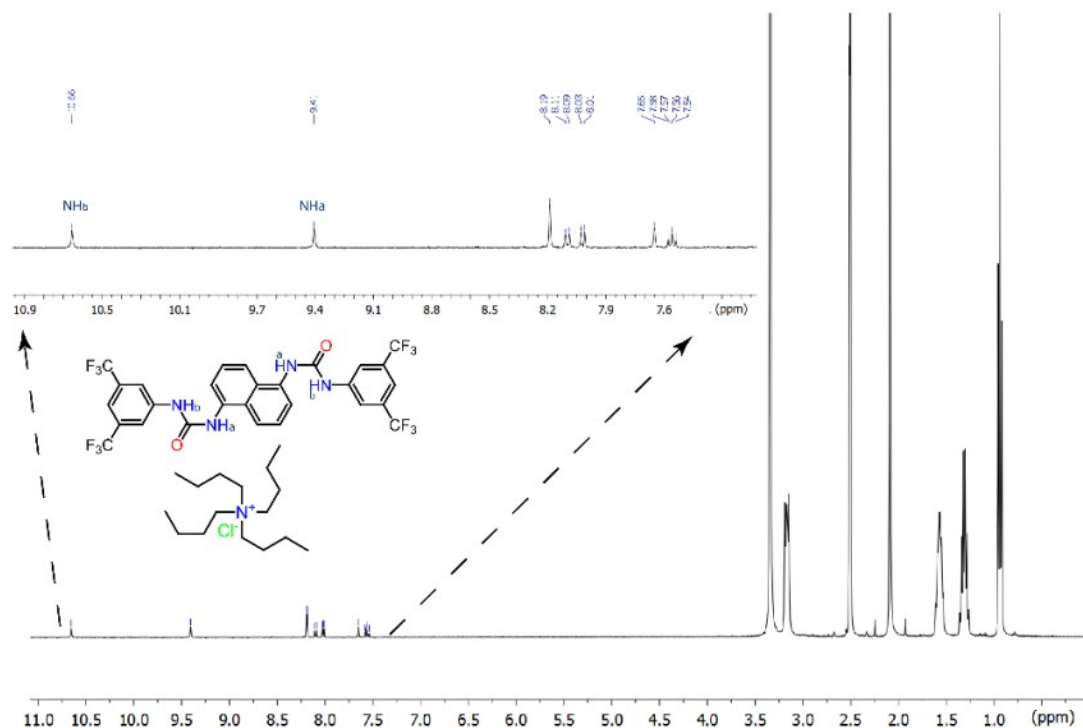

**Figure S22:** Integrated  $^1\text{H}$ -NMR spectrum (full as well as expanded) and explanation of all hydrogen atoms of Chloride complex of receptor  $\text{L}_4$  in  $\text{DMSO-d}_6$  at  $25^\circ\text{C}$ .

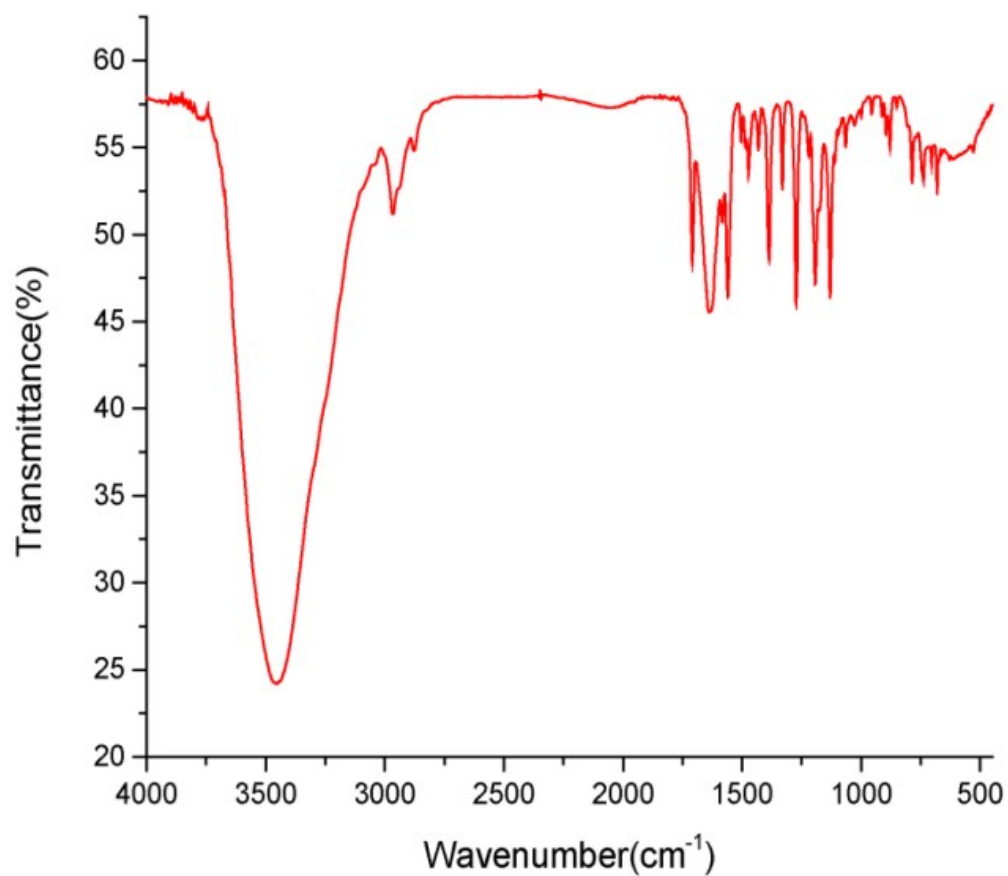

**Figure S23:** FT-IR spectrum of Bhl chloride complex of receptor  $\text{L}_4$  recorded in KBr pellet.

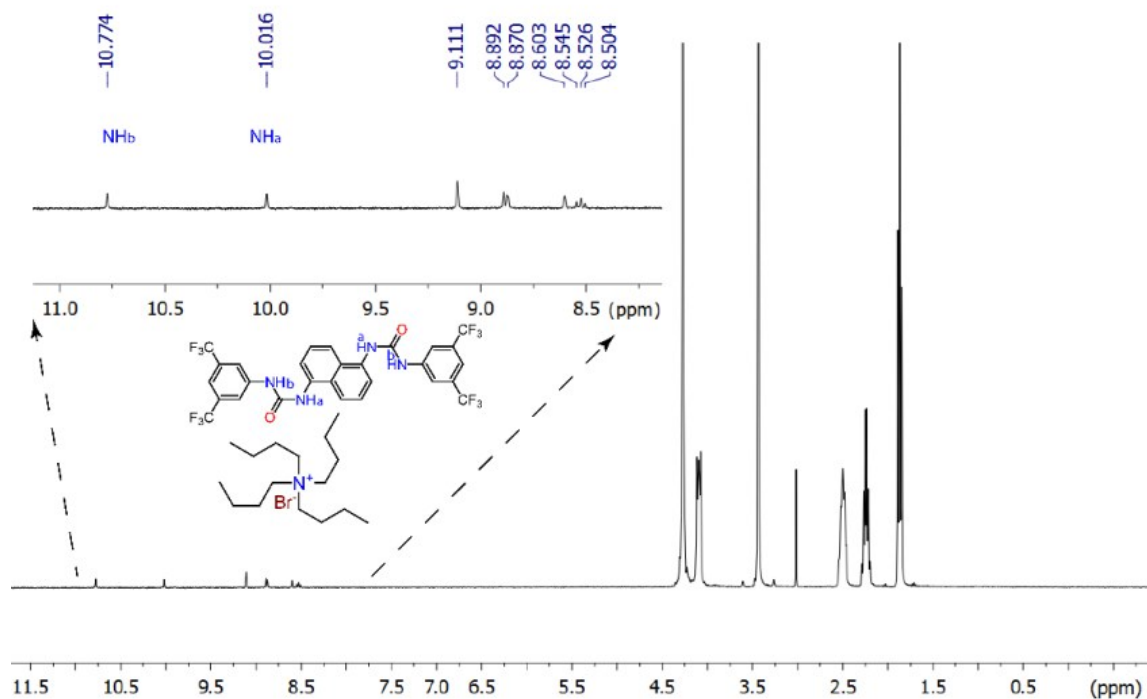

**Figure S24:** Integrated  $^1\text{H}$ -NMR spectrum (full as well as expanded) Bromide complex of receptor  $\text{L}_4$  in  $\text{DMSO-d}_6$  at  $25^\circ\text{C}$ .

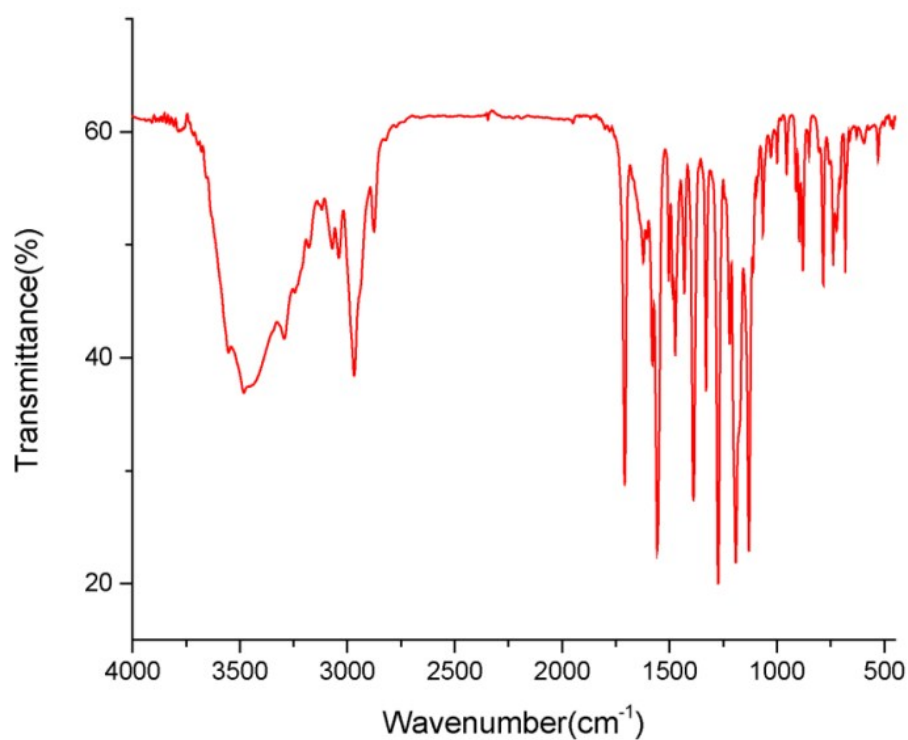

**Figure S25:** FT-IR spectrum of Bromide complex of dipodal receptor  $\text{L}_4$  recorded in KBr pellet.

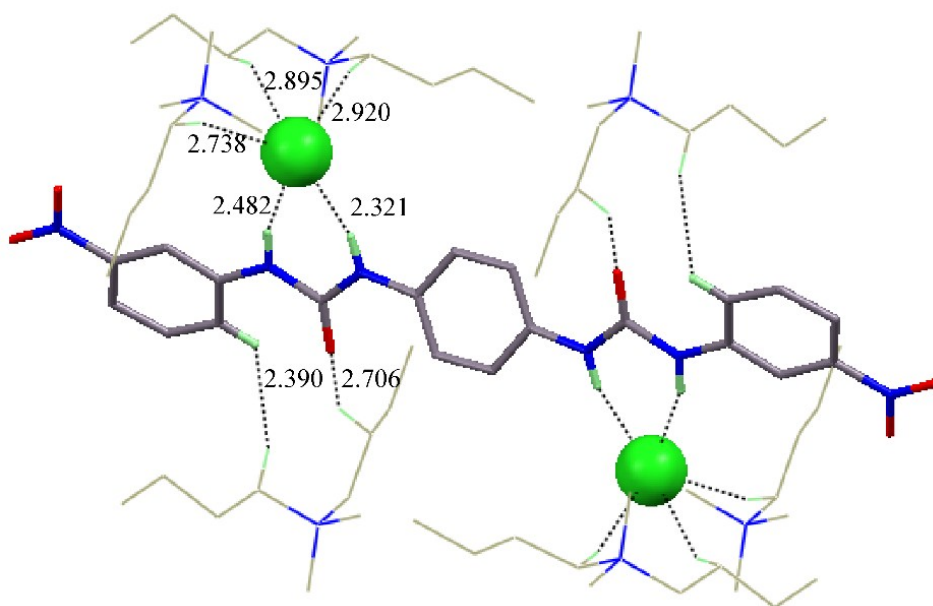

**Figure S26:** X-ray structure analysis of complex **1a** showing coordination environment of anion as well as extra stabilization through  $\text{C-H}_{\text{aliphatic}} \cdots \text{O}_{\text{urea}}$  and  $\text{C-H}_{\text{aliphatic}} \cdots \pi_{\text{aromatic}}$  interaction with proper bond distances in Angstrom.

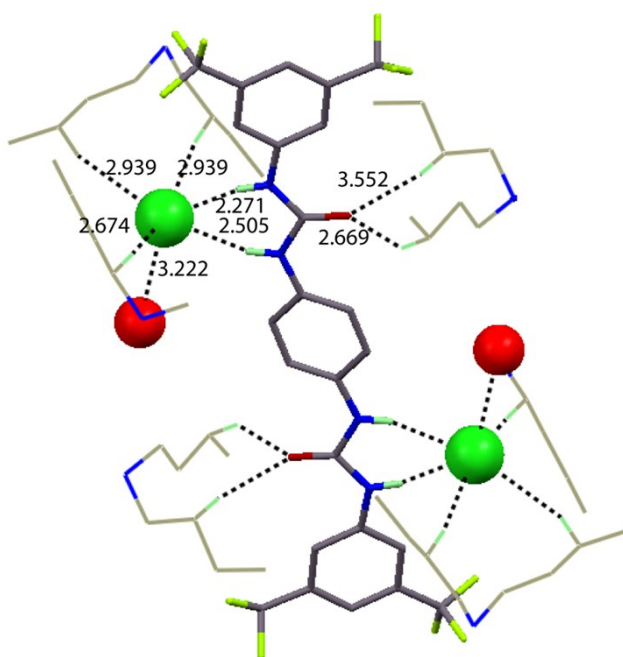

**Figure S27:** X-ray structure analysis of complex **2a** showing coordination environment of anion as well as extra stabilization through two  $\text{C-H}_{\text{aliphatic}} \cdots \text{O}_{\text{urea}}$  with proper bond distances in Angstrom.

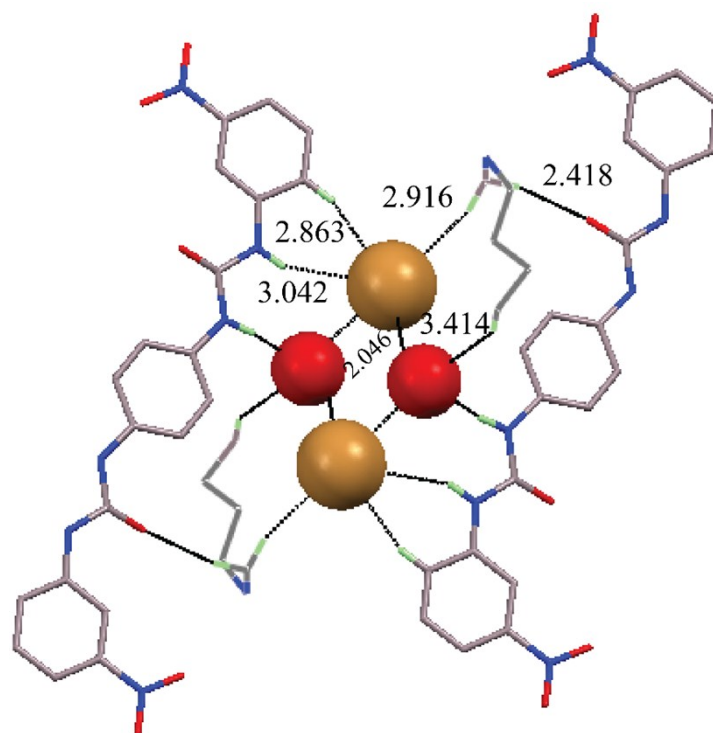

**Figure S28:** X-ray structure analysis of complex **1b** showing coordination environment of anion as well as extra stabilization through C-H<sub>aliphatic</sub>...O<sub>urea</sub>, C-H<sub>aliphatic</sub>...  $\pi$ <sub>aromatic</sub> C-H<sub>aliphatic</sub>...O<sub>water</sub> interaction with proper bond distances in Angstrom.

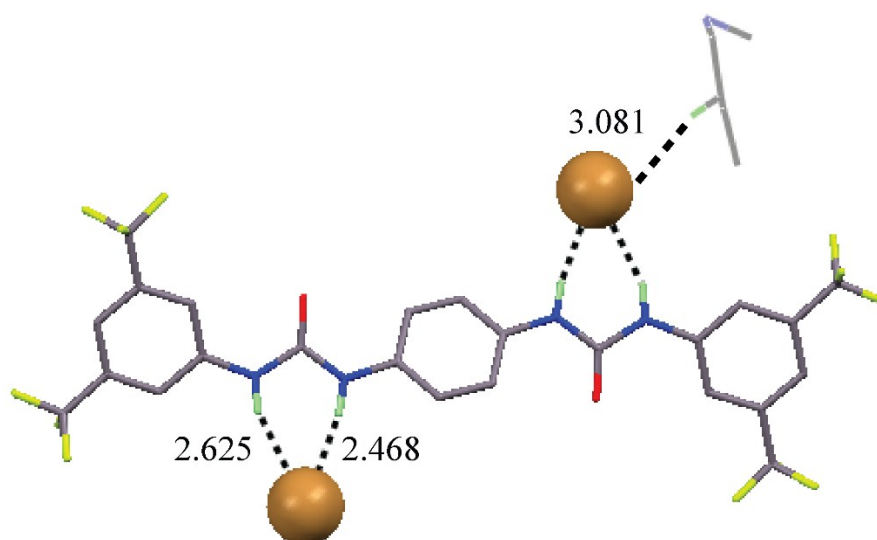

**Figure S29:** X-ray structure analysis of complex **2b** showing coordination environment of anion as well as extra stabilization through C-H<sub>aliphatic</sub>...O<sub>urea</sub>, with proper bond distances in Angstrom.

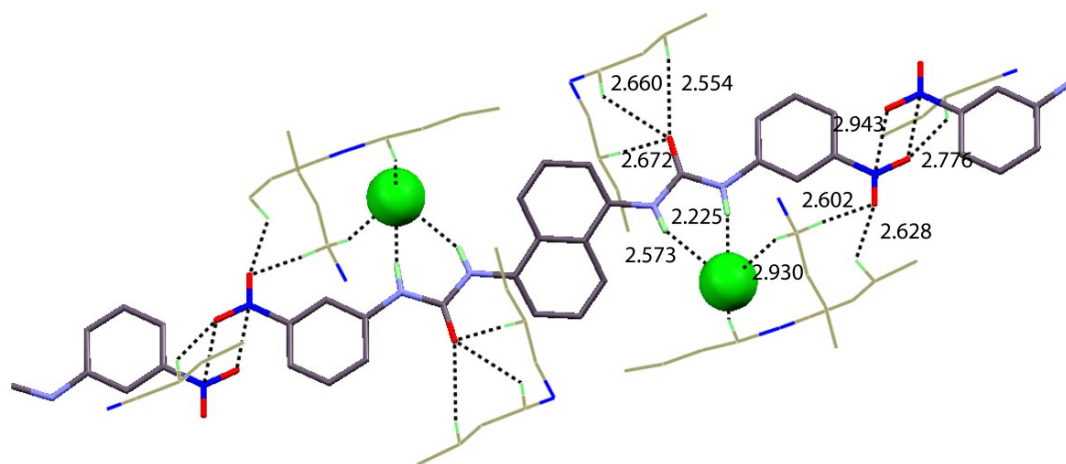

**Figure S30:** X-ray structure analysis of complex **3a** showing coordination environment of anion as well as extra stabilization through three C-H<sub>aliphatic</sub>...O<sub>urea</sub>, four C-H<sub>aliphatic</sub>...O interaction from two different oxygen of substituted NO<sub>2</sub> group and one cross connected parallel C-H...O interaction between two NO<sub>2</sub> groups of each host site with proper bond distances in Angstrom.

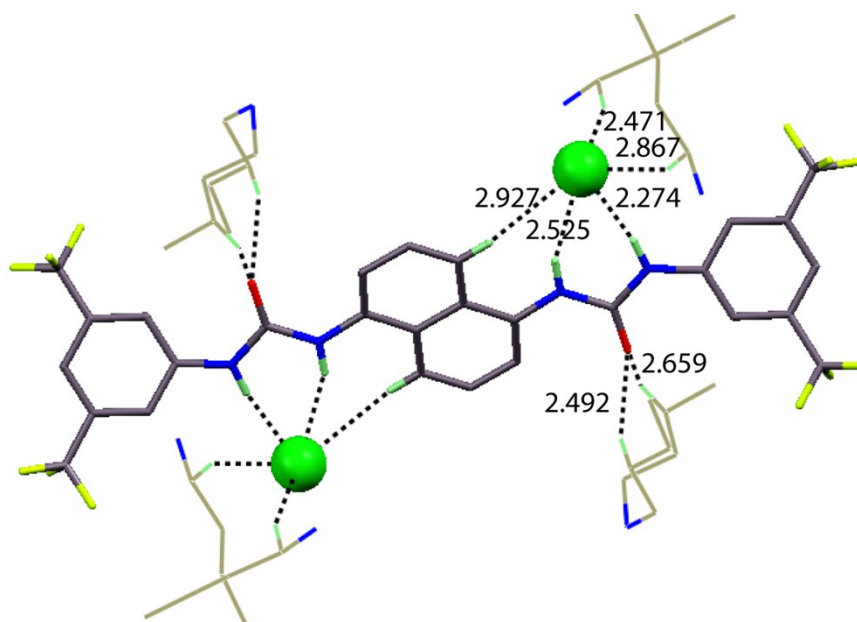

**Figure S31:** X-ray structure analysis of complex **4a** showing coordination environment of anion as well as extra stabilization through two C-H<sub>aliphatic</sub>...O<sub>urea</sub> interaction with proper distances in Angstrom.

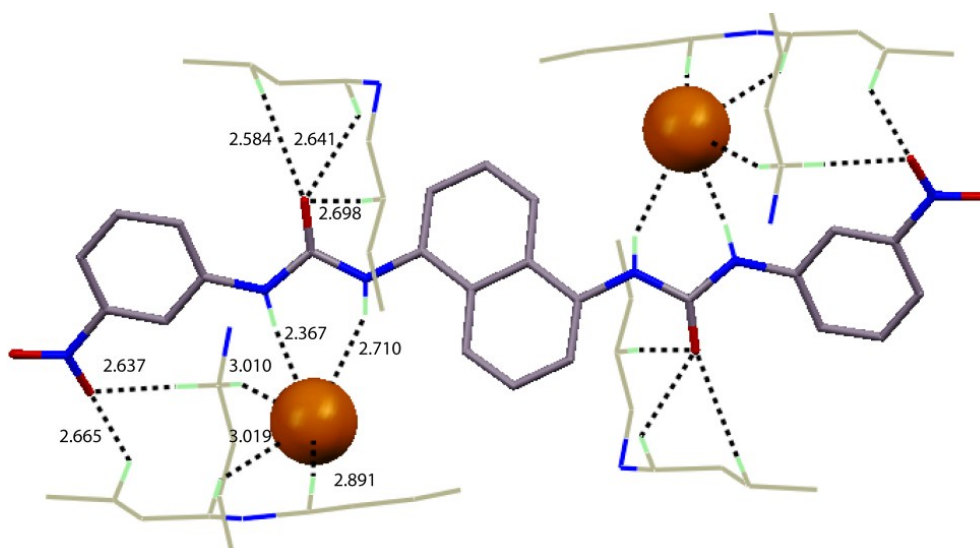

**Figure S32:** X-ray structure analysis of complex **3b** showing coordination environment of anion as well as extra stabilization through three C-H<sub>aliphatic</sub>...O<sub>urea</sub>, two C-H<sub>aliphatic</sub>...O interaction involving one oxygen atom of substituted NO<sub>2</sub> group with proper bond distances in Angstrom.

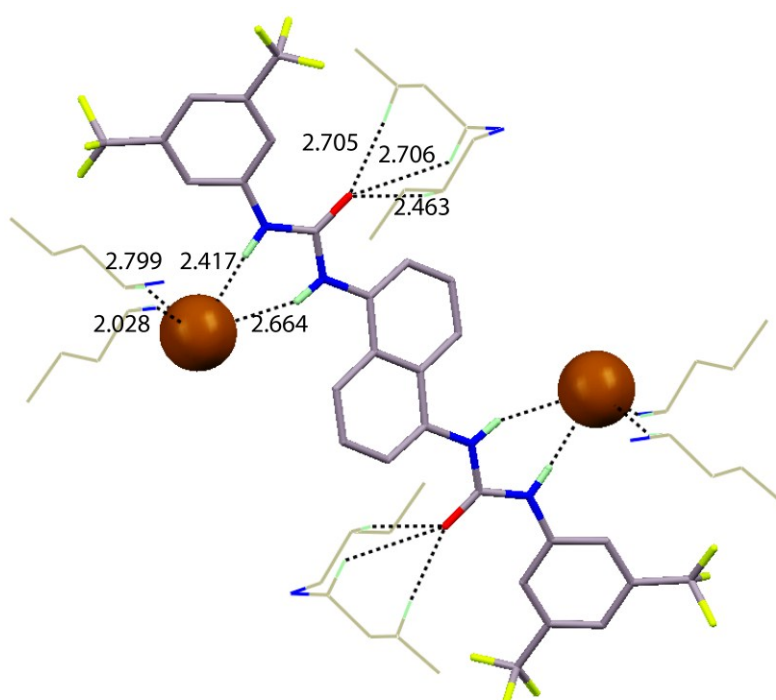

**Figure S33:** X-ray structure analysis of complex **4b** showing coordination environment of anion as well as extra stabilization through three C-H<sub>aliphatic</sub>...O<sub>urea</sub> interaction with proper distances in Angstrom.

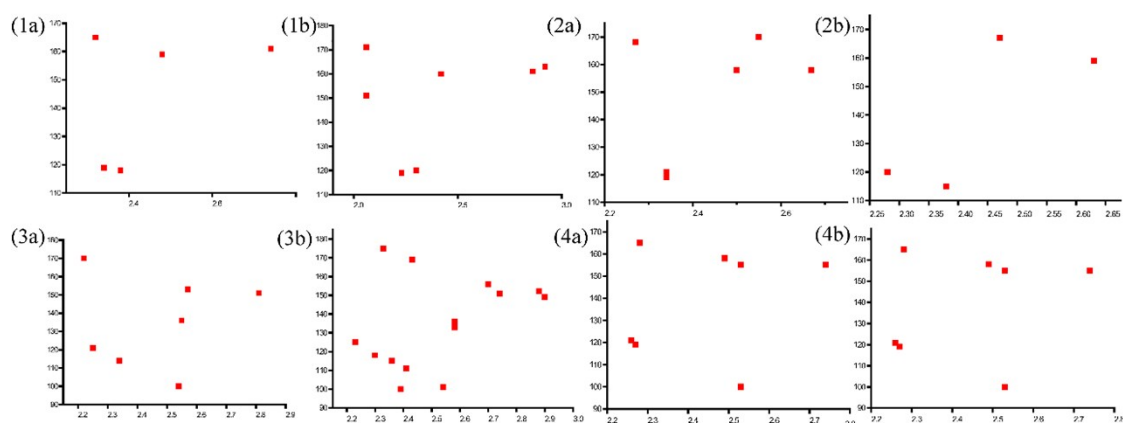

**Figure S34:** The scatter plot of N–H···A angle vs. H···A distance of the hydrogen bonds in the complexes (**1a**, **1b**, **2a**, **2b**, **3a**, **3b**, **4a** and **4b**).

**Anion binding analysis by  $^1\text{H}$ -NMR titrations** — The  $^1\text{H}$  NMR titration of the compounds was performed in  $\text{DMSO-}d_6$  solvent. The stock solutions of the compound (10 mM), tetrabutyl ammonium Chloride (TBACl; 2 M) and tetrabutyl ammonium Bromide (TBABr; 2 M) were prepared in  $\text{DMSO-}d_6$ . The TBACl and TBABr were used as the source of  $\text{Cl}^-$  and  $\text{Br}^-$  ion. The changes in chemical shift ( $\Delta\delta$ ) value of the N-H protons of the urea-moieties were analysed. Significant extents of chemical shift ( $\Delta\delta$ ) of both N-H protons were observed. All  $^1\text{H}$  NMR spectra were stacked through the MestReNova software. Changes in chemical shift against the concentration of  $\text{Cl}^-$  as well as  $\text{Br}^-$  ions were fitted using BindFit v0.5 program.<sup>1</sup>

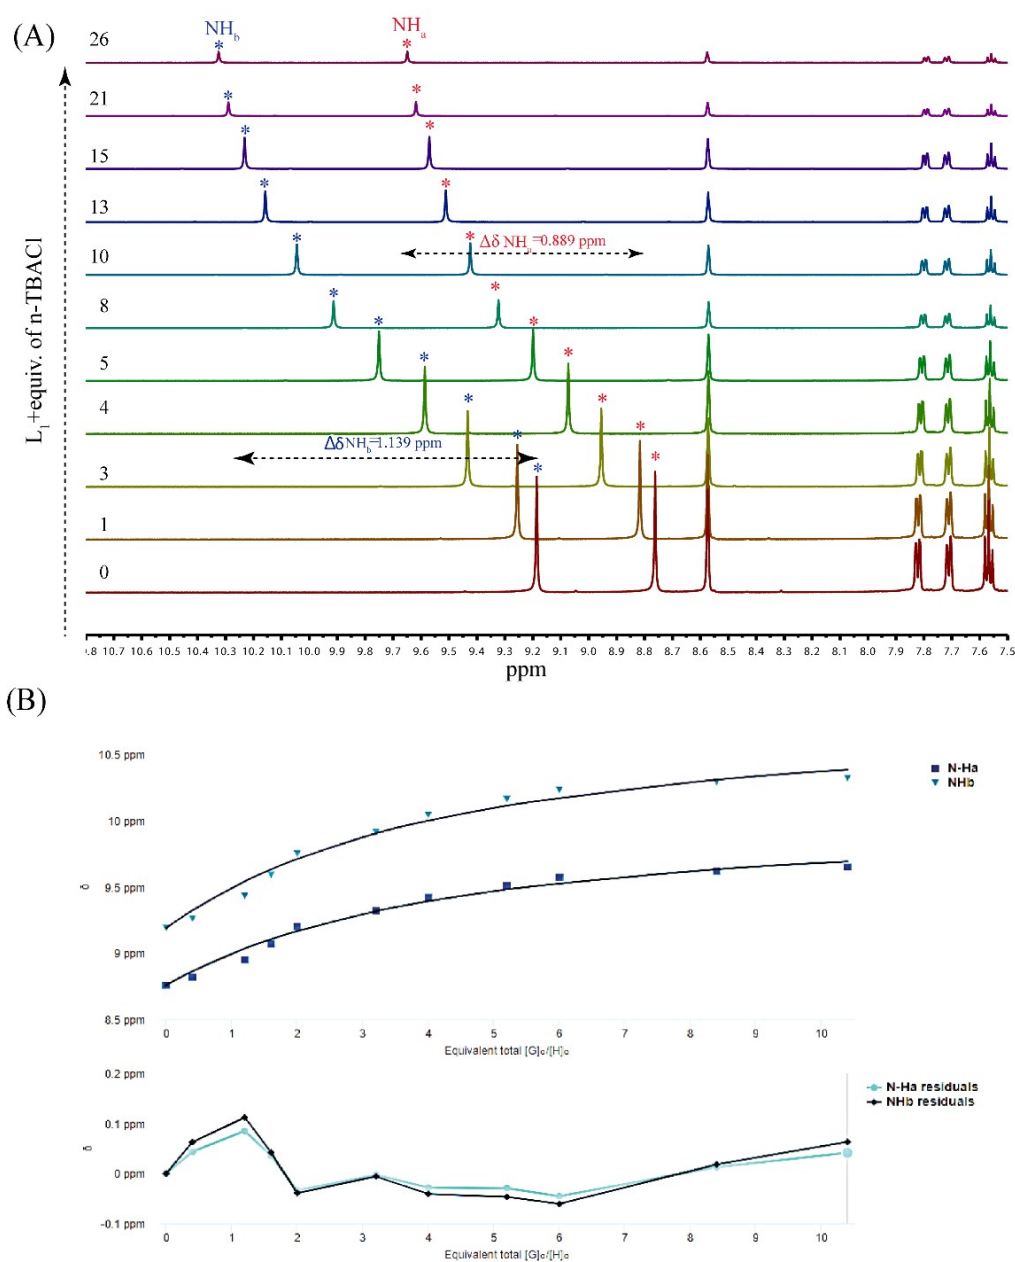

**Figure S35:** (A) Expanded partial  $^1\text{H}$  NMR spectra of  $\text{L}_1$  upon titration with  $n\text{-TBACl}$  in  $\text{DMSO-d}_6$ . (B) Showing the raw vs. fitted data (fitted to 1:1 NMR binding data) (top) and the corresponding residual plot (bottom). Binding constant ( $K$ ) =  $24.36 \text{ M}^{-1}$  (Ref. 2).

(<http://app.supramolecular.org/bindfit/view/a04aa7b4-1b10-4ec4-b62a-004488bc153d>)

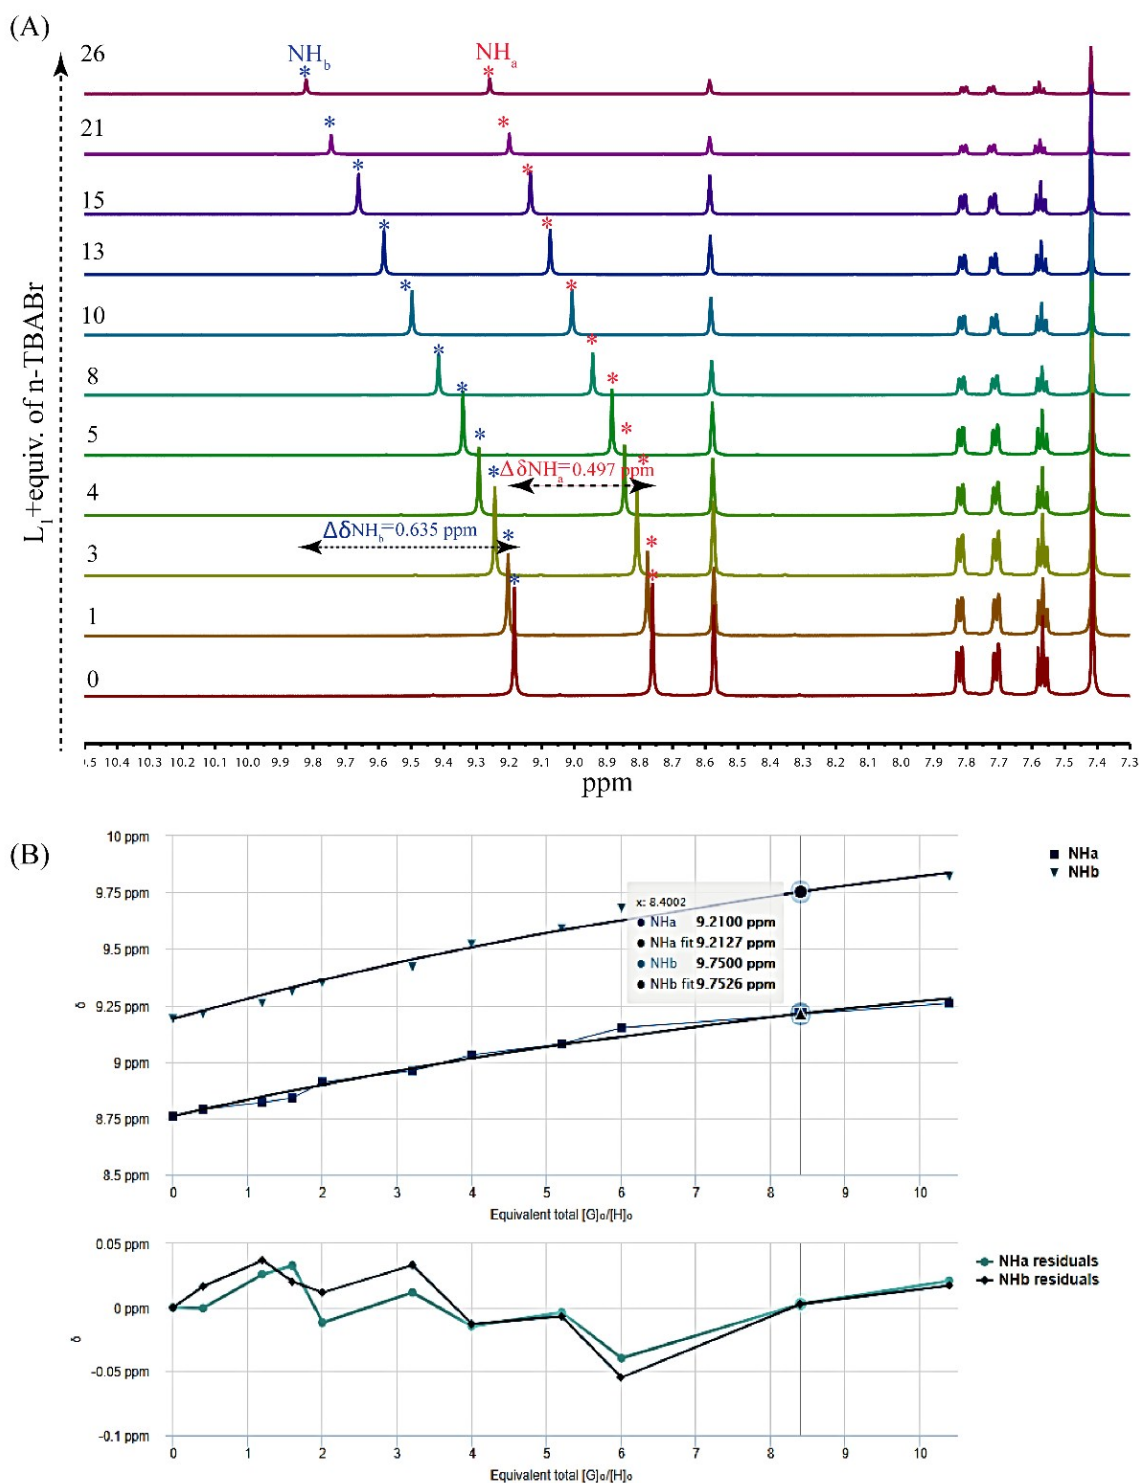

**Figure S36:** (A) Expanded partial  $^1\text{H}$  NMR spectra of  $\text{L}_1$  upon titration with n-TBABr in  $\text{DMSO-d}_6$ . (B) Showing the raw vs. fitted data (fitted to 1:1 NMR binding data) (top) and the corresponding residual plot (bottom). Binding constant ( $K$ ) =  $2.85 \text{ M}^{-1}$  (Ref 2).

(<http://app.supramolecular.org/bindfit/view/2f704e70-704c-4c4a-b586-861ec75747dc>)

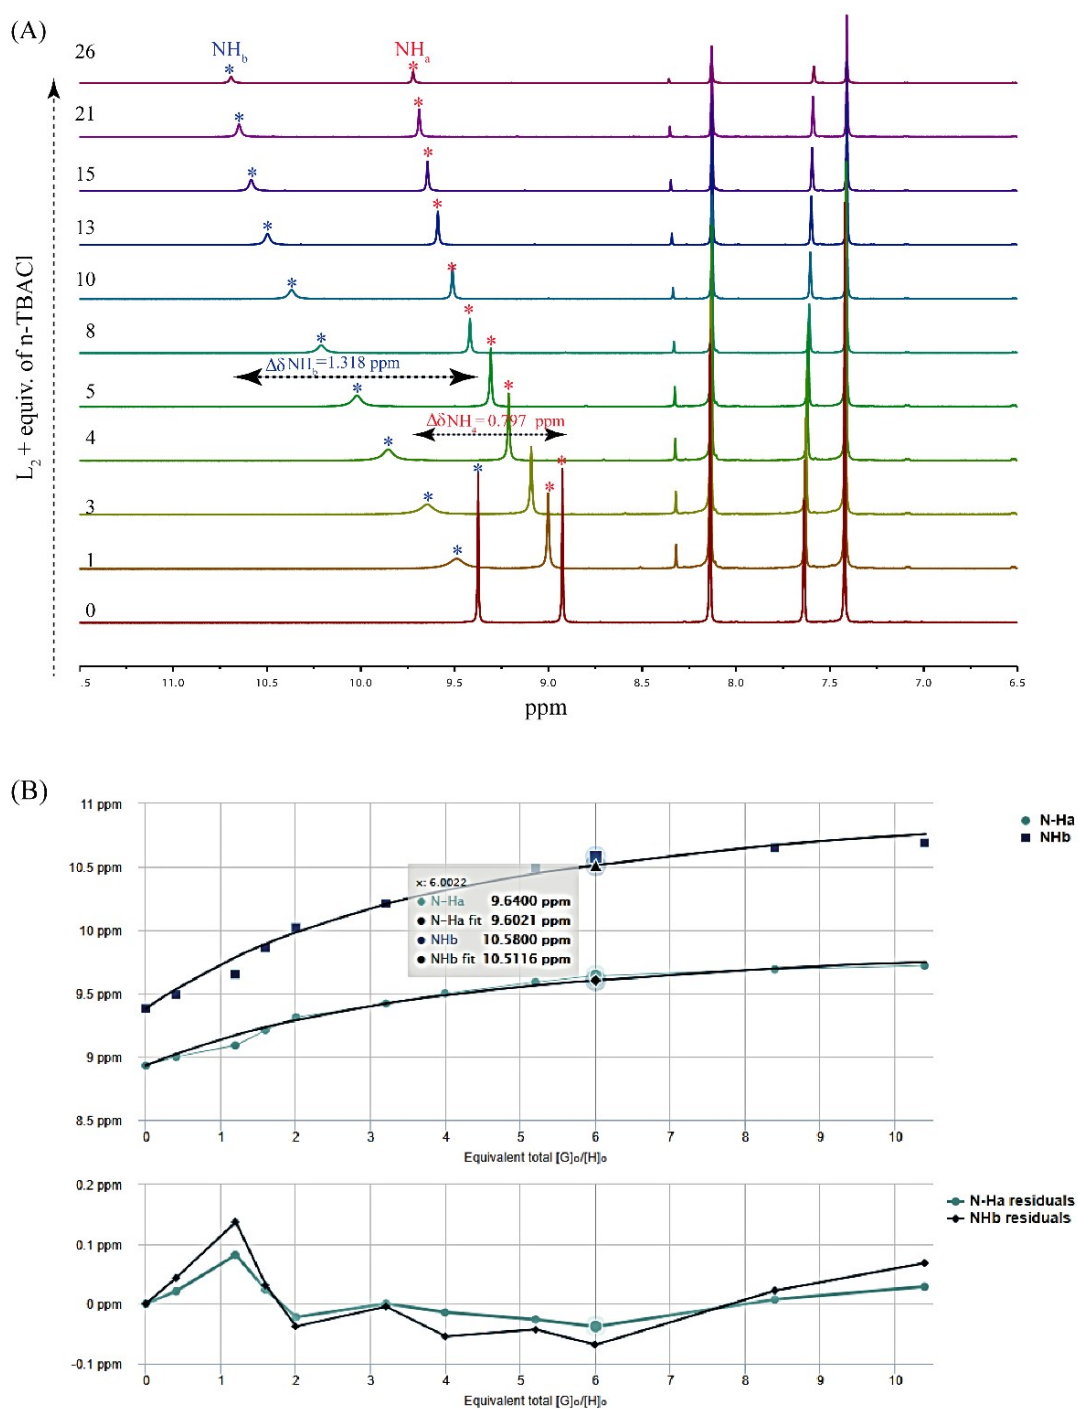

**Figure S37:** (A) Expanded partial  $^1\text{H}$  NMR spectra of  $\text{L}_2$  upon titration with  $n\text{-TBACl}$  in  $\text{DMSO-d}_6$ . (B) Showing the raw vs. fitted data (fitted to 1:1 NMR binding data) (top) and the corresponding residual plot (bottom). Binding constant ( $K$ ) =  $24.43 \text{ M}^{-1}$  (Ref 2).

(<http://app.supramolecular.org/bindfit/view/ee741007-4a26-4279-9860-6c57eaca46fb>)

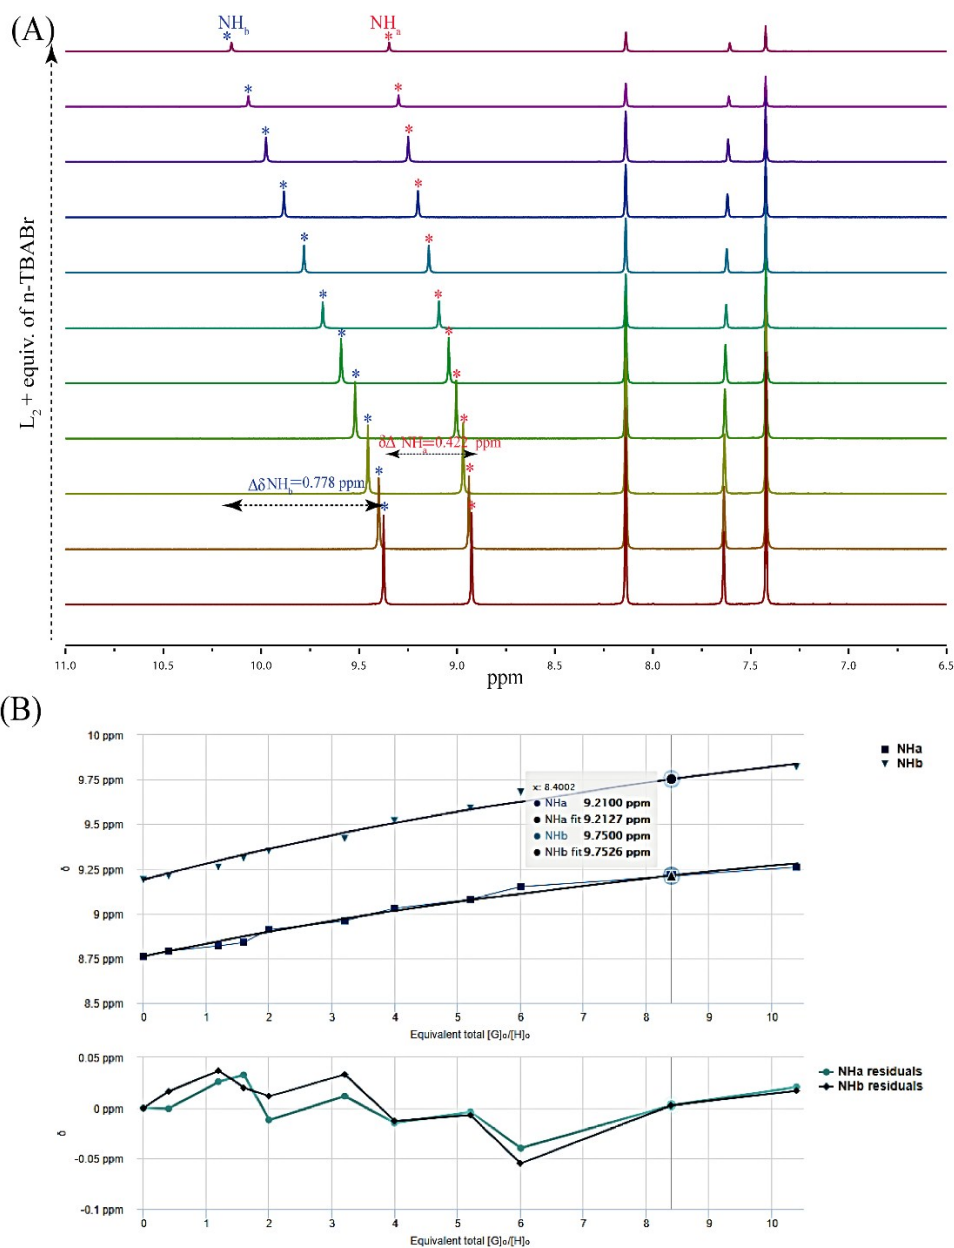

**Figure S38:** (A) Expanded partial  $^1\text{H}$  NMR spectra of  $\text{L}_2$  upon titration with n-TBABr in  $\text{DMSO-d}_6$ . (B) Showing the raw vs. fitted data (fitted to 1:1 NMR binding data) (top) and the corresponding residual plot (bottom). Binding constant ( $K$ ) =  $2.72 \text{ M}^{-1}$  (Ref 2)

(<http://app.supramolecular.org/bindfit/view/c24e85bf-7407-49e2-87cb-19270479e6fd>)

**Table S1:** Hydrogen bonding distances (Å) and Bond angles (°) in the neutral anion-receptor complexes:

| Complex | D-H...A        | d(D...H)/Å | d(H...A)/Å | d(D...A)/Å | <D-H...A/° | Symmetry codes    |
|---------|----------------|------------|------------|------------|------------|-------------------|
| 1a      | N2-H2N...Cl1   | 0.86       | 2.48       | 3.299(5)   | 159        | 1-x, 1/2+y, 1/2-z |
|         | N3-H3N...Cl1   | 0.86       | 2.32       | 3.159(5)   | 165        | 1-x, 1/2+y, 1/2-z |
|         | C6-H6...O3     | 0.93       | 2.34       | 2.901(9)   | 119        | x, y, z           |
|         | C10-H10...O3   | 0.93       | 2.38       | 2.934(9)   | 118        | x, y, z           |
|         | C16-H16B...O1  | 0.97       | 2.61       | 3.515(1)   | 154        | x, y, z           |
|         | C15-H15A...Cl1 | 0.97       | 2.92       | 3.861(7)   | 163        | x, y, z           |
|         | C11-H11A...Cl1 | 0.97       | 2.74       | 3.669(7)   | 161        | x, y, z           |
|         | C20-H20B...Cl1 | 0.97       | 2.89       | 3.748(8)   | 147        | x, y, z           |
| 1b      | N2-H2N...Br1   | 0.86       | 2.06       | 3.838(6)   | 151        | -x, 1-y, -z       |
|         | N3-H3N...O4    | 0.86       | 2.05       | 2.898(8)   | 170        | 1-x, 1-y, -z      |
|         | C4-H4...Br1    | 0.93       | 2.86       | 3.753(8)   | 161        | x, y, z           |
|         | C6-H6...O3     | 0.93       | 2.23       | 2.798(8)   | 119        | x, y, z           |
|         | C10-H10...O3   | 0.93       | 2.29       | 2.867(9)   | 119        | x, y, z           |
|         | C18-H18A...O3  | 0.97       | 2.42       | 3.348(10)  | 161        | x, -1+y, z        |
|         | O4-H4A...Br1   | 0.85       | 2.70       | 3.413(7)   | 143        | x, y, z           |
|         | O4-H4B...Br1   | 0.85       | 2.37       | 3.206(6)   | 167        | 1-x, 1-y, -z      |
|         | C18-H18B...Br1 | 0.97       | 2.92       | 3.851(10)  | 162        | x, y, z           |
| 2a      | N1-H1...Cl1    | 0.86       | 2.27       | 3.115(6)   | 168        | x, y, z           |
|         | N2-H2...Cl1    | 0.86       | 2.50       | 3.317(6)   | 158        | x, y, z           |
|         | C8-H8...O1     | 0.93       | 2.34       | 2.908(7)   | 119        | x, y, z           |
|         | C12-H12...O1   | 0.93       | 2.34       | 2.929(7)   | 121        | x, y, z           |
|         | C14-H14B...O1  | 0.97       | 2.55       | 3.510(8)   | 170        | x, 1-y, 1/2+z     |
|         | C24-H24A...Cl1 | 0.97       | 2.67       | 3.589(6)   | 158        | x, y, z           |
| 2b      | N1-H1N...Br1   | 0.86       | 2.63       | 3.441(4)   | 159        | x, y, z           |
|         | N2-H2N...Br1   | 0.86       | 2.47       | 3.312(4)   | 167        | x, y, z           |
|         | C6-H6...O1     | 0.93       | 2.28       | 2.855(6)   | 120        | x, y, z           |
|         | C11-H11...O1   | 0.93       | 2.38       | 2.894(6)   | 115        | x, y, z           |
| 3a      | N1-H1N...Cl1   | 0.86       | 2.57       | 3.360(2)   | 153        | x, y, z           |
|         | N2-H2N...Cl1   | 0.86       | 2.22       | 3.076(2)   | 170        | x, y, z           |
|         | C4-H4...O1     | 0.93       | 2.25       | 2.850(3)   | 121        | x, y, z           |
|         | C9-H9...O1     | 0.93       | 2.34       | 2.854(3)   | 114        | x, y, z           |
|         | C11-H11...N1   | 0.93       | 2.54       | 2.850(3)   | 100        | 1-x, 1-y, 1-z     |
|         | C14-H14A...O1  | 0.97       | 2.55       | 3.318(4)   | 136        | x, y, z           |
|         | C20-H20B...Cl1 | 0.97       | 2.81       | 3.691(4)   | 152        | x, -1+y, z        |
|         | N2-H2N...Br1   | 0.86       | 2.36       | 2.367(4)   | 173        | 1+x, 1+y, z       |

|    |                  |      |      |          |     |             |
|----|------------------|------|------|----------|-----|-------------|
| 3b | N3-H3N... Br1    | 0.86 | 2.70 | 2.709(5) | 154 | 1+x,1+y,z   |
|    | C16-H16...Br1    | 0.97 | 2.89 | 3.767(3) | 150 | 1+x, y, z   |
|    | C22-H22B...O3    | 0.97 | 2.58 | 2.584(2) | 134 | x, y, z     |
|    | C22-H22A...O2    | 0.97 | 2.66 | 3.334(5) | 126 | x, y, z     |
|    | C23-H23A...O1    | 0.97 | 2.66 | 3.534(3) | 149 | x, y, z     |
|    | C24-H24A...O3    | 0.97 | 2.64 | 3.394(4) | 134 | x, y, z     |
|    | C27-H27A...O3    | 0.97 | 2.69 | 3.666(4) | 175 | x, y, z     |
|    | C28-H28A...O2    | 0.97 | 2.63 | 3.522(4) | 151 | x, y, z     |
| 4a | N1-H1N...Cl1     | 0.86 | 2.28 | 3.115(4) | 165 | x,y,z       |
|    | N2-H2N...Cl1     | 0.86 | 2.53 | 3.326(4) | 155 | x,y,z       |
|    | C7-H7...O1       | 0.93 | 2.27 | 2.835(6) | 119 | x,y,z       |
|    | C11-H11...O1     | 0.93 | 2.26 | 2.852(6) | 121 | x,y,z       |
|    | C13-H13...N2     | 0.93 | 2.53 | 2.841(5) | 100 | -x,1-y,-z   |
|    | C17-H17A...O1    | 0.97 | 2.49 | 3.414(6) | 158 | x,1-y,1/2+z |
|    | C22-H22B...Cl1   | 0.97 | 2.74 | 3.642(5) | 155 | x,y,z       |
| 4b | N10-H10N...Br1   | 0.86 | 2.67 | 3.472(4) | 157 | x,y,z       |
|    | N17-H17N...Br1   | 0.86 | 2.42 | 3.258(4) | 166 | x,y,z       |
|    | C5-H5...O25      | 0.93 | 2.29 | 2.856(7) | 119 | x,y,z       |
|    | C24-H24...O25    | 0.93 | 2.26 | 2.851(8) | 121 | x,y,z       |
|    | C28-H28B...O25   | 0.97 | 2.47 | 3.390(9) | 159 | x,1-y,1/2+z |
|    | C29-H29A...Br(1) | 0.97 | 2.93 | 3.803(6) | 151 | x,1+y,z     |
|    | C35-H35A...Br(1) | 0.97 | 2.80 | 3.702(6) | 155 | x,y,z       |
|    | C57-H57...N10    | 0.93 | 2.53 | 2.841(7) | 100 | x,y,z       |

**Table S2:** Contact contributions from the  $d_{\text{norm}}$  surface areas of dipodal segments in free receptors and in anion complexes.

| Bond   | 1a   | 1b   | 2a   | 2b   | 3a   | 3b   | 4a   | 4b   |
|--------|------|------|------|------|------|------|------|------|
| C...H  | 21.4 | 16.9 | 11.8 | 9.5  | 20.3 | 19.9 | 15.2 | 14.7 |
| O...H  | 19.6 | 27.6 | 10.5 | 3.4  | 20.5 | 20.3 | 11.6 | 11.8 |
| F...H  | 0    | 0    | 24.8 | 36.4 | 0    | 0    | 24.6 | 24   |
| N...H  | 4    | 4.6  | 2.4  | 1.7  | 3.9  | 3.9  | 2.4  | 2.4  |
| H...H  | 37.8 | 33.6 | 21.4 | 22.3 | 41.2 | 41.2 | 25.1 | 25   |
| Cl...H | 12.7 | 0    | 19.2 | 0    | 11.2 | 0    | 8.5  | 0    |
| Br...H | 0    | 13.4 | 0    | 12.7 | 0    | 12.4 | 0    | 9.3  |

## References:

1. D. Brynn Hibbert and P. Thordarson, Chem Commun, 2016, **52**, 12792-12805.
2. <http://supramolecular.org>.
